# Supplementary material for: Epigenetic Dysregulation of KCNK9 Imprinting and Triple-Negative Breast Cancer
Source: MDPI journal article supplement (doi:10.3390/cancers13236031), 2021-11-30

Figure S1. Figure 4C – MCF10A – TASK 3

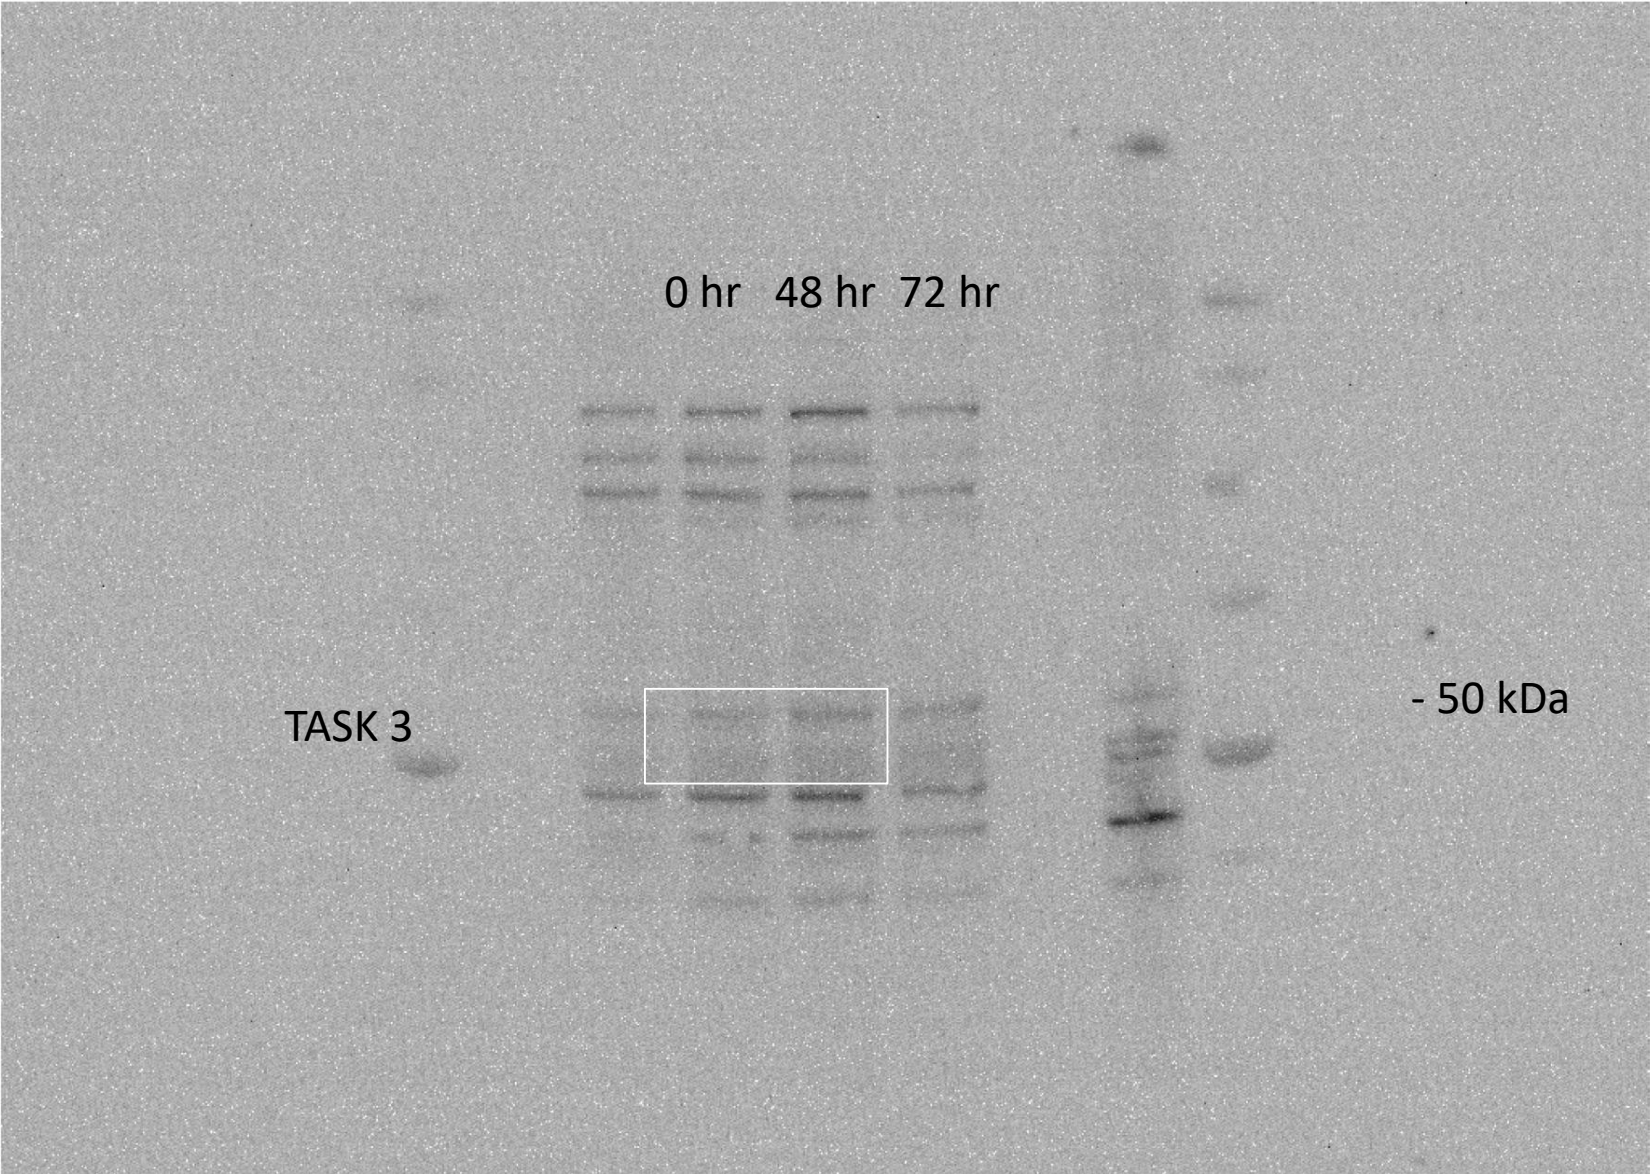

Figure S2. Figure 4C – MCF10A – GAPDH

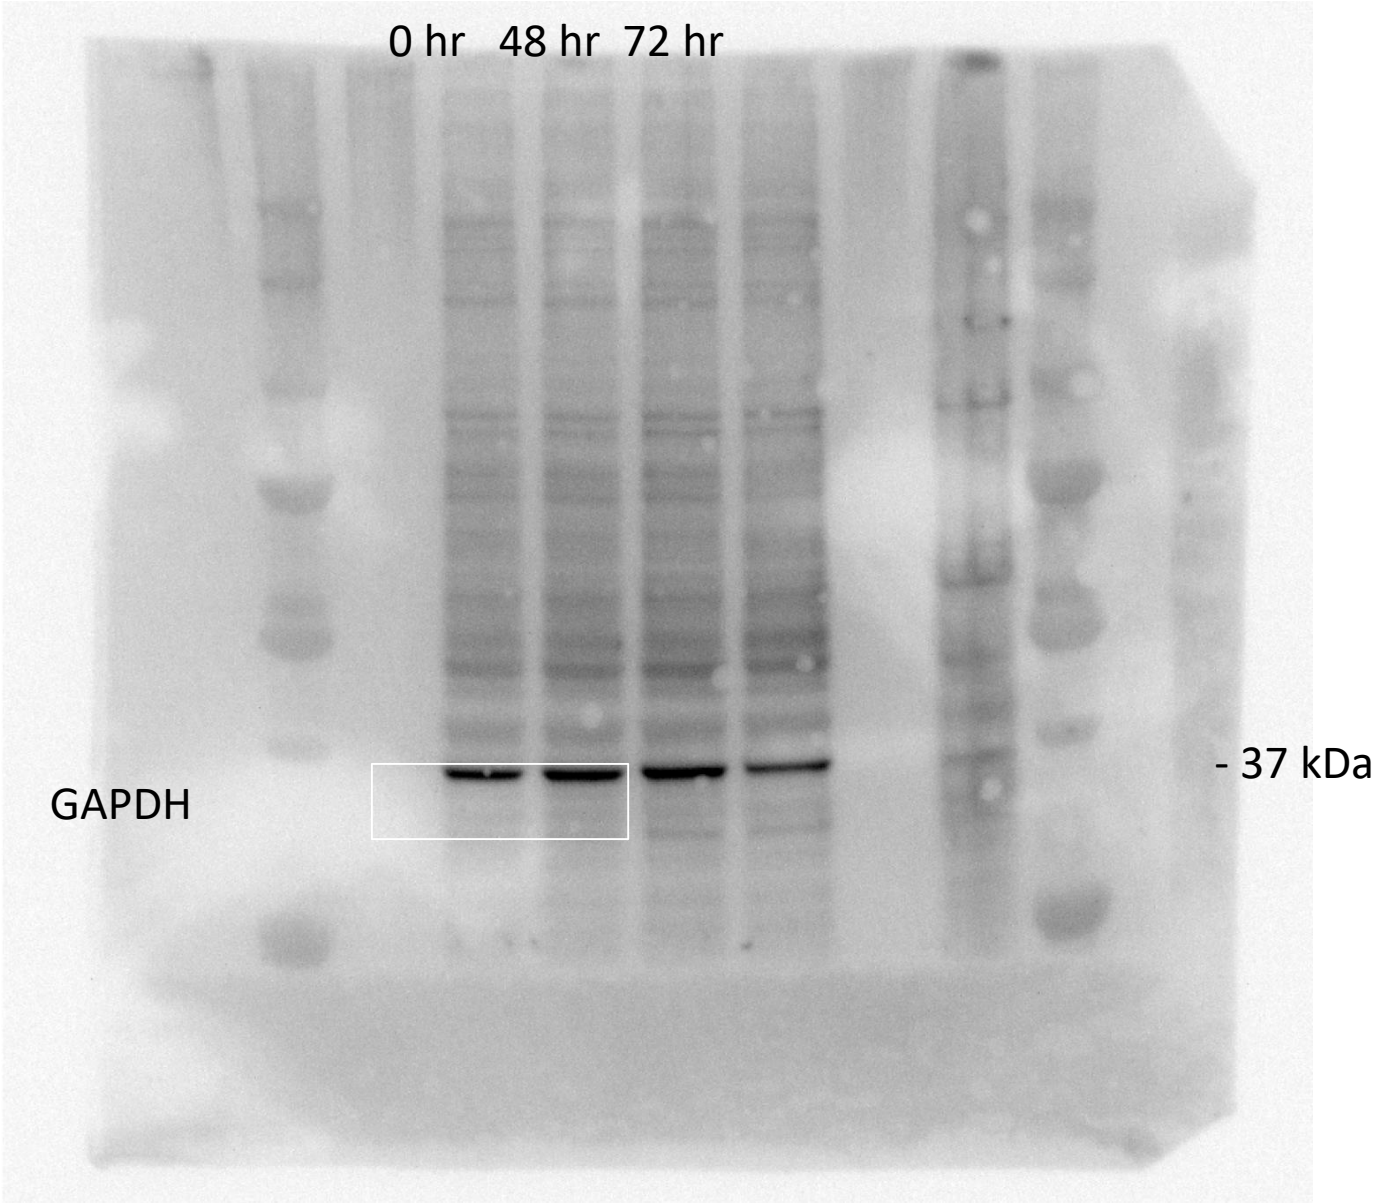

Figure S3. Figure 4C – HMEC15 Set 1 – Expt 2 – Uncropped TASK3 western

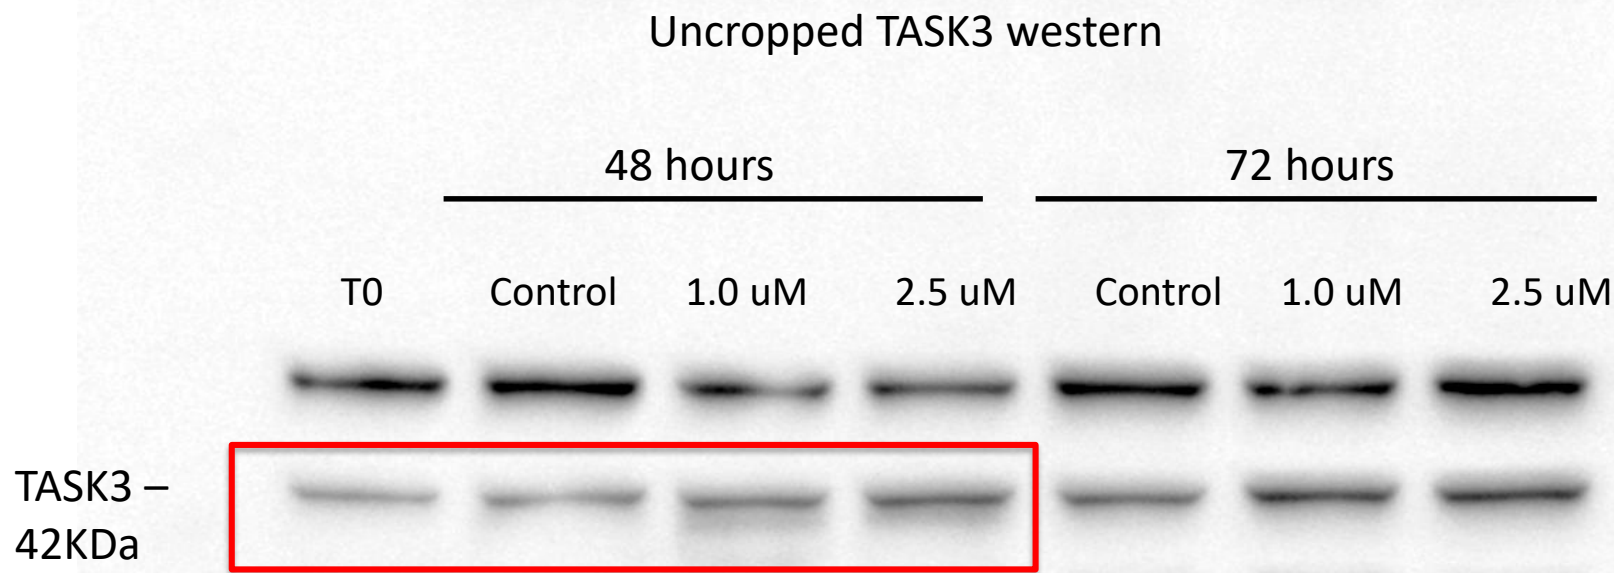

Figure S4. Figure 4C – HMEC15 Set 1 – Expt 2 – Uncropped TASK3 with ladder

Uncropped TASK3 with ladder

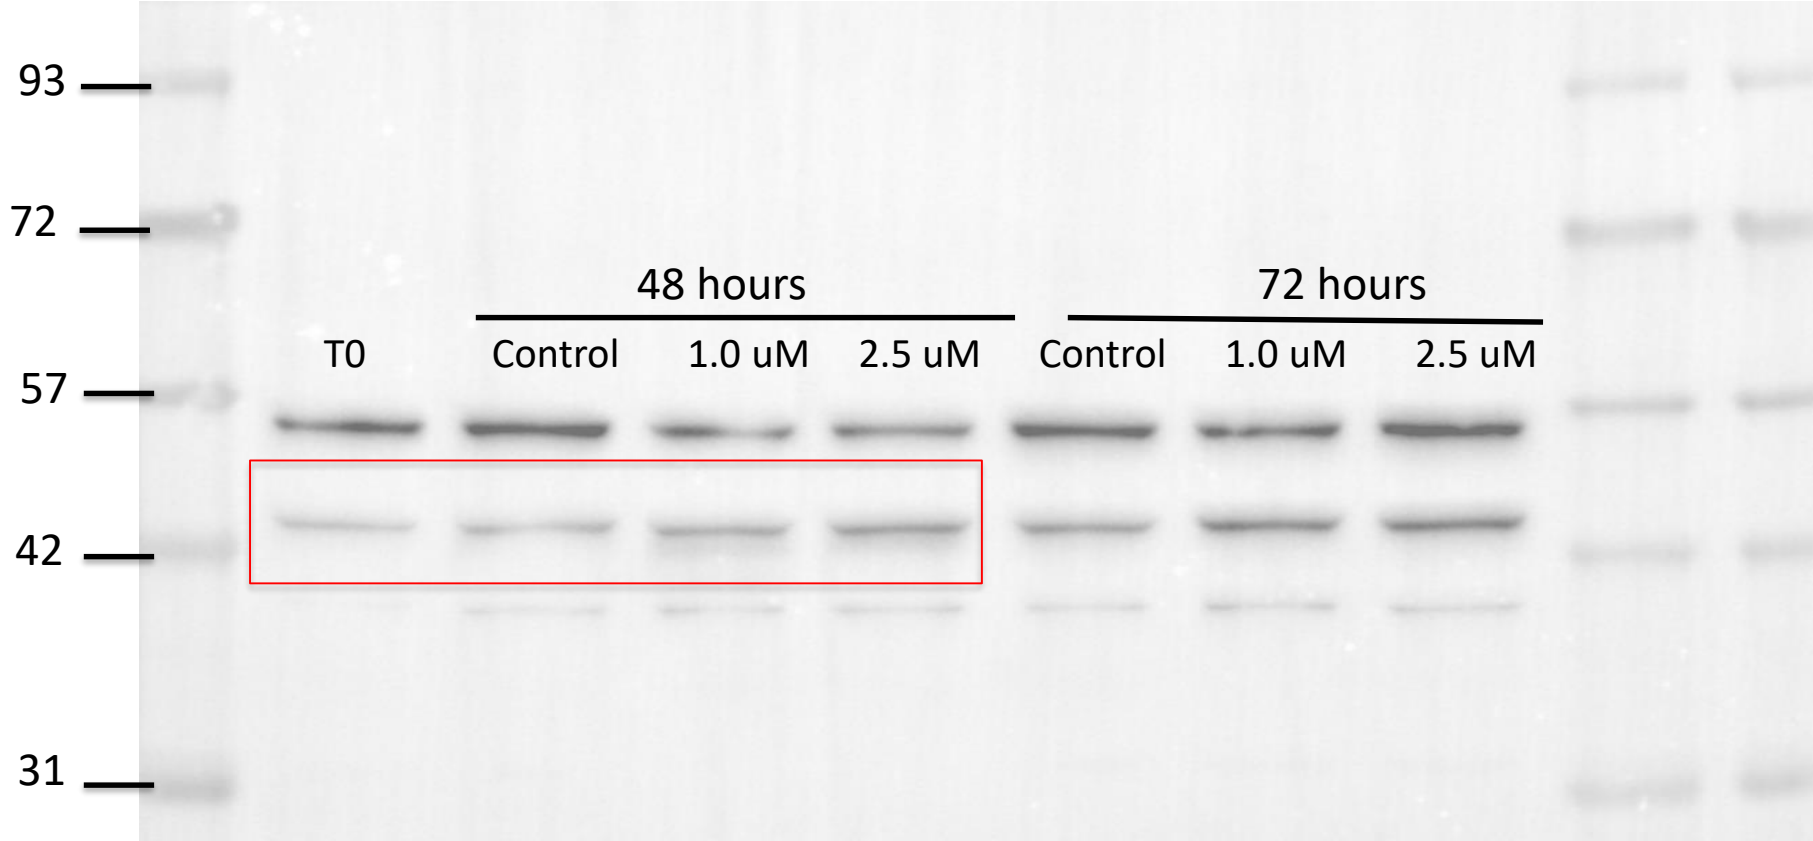

Figure S5. Figure 4C – HMEC15 – set 1 – loading control – Expt 2

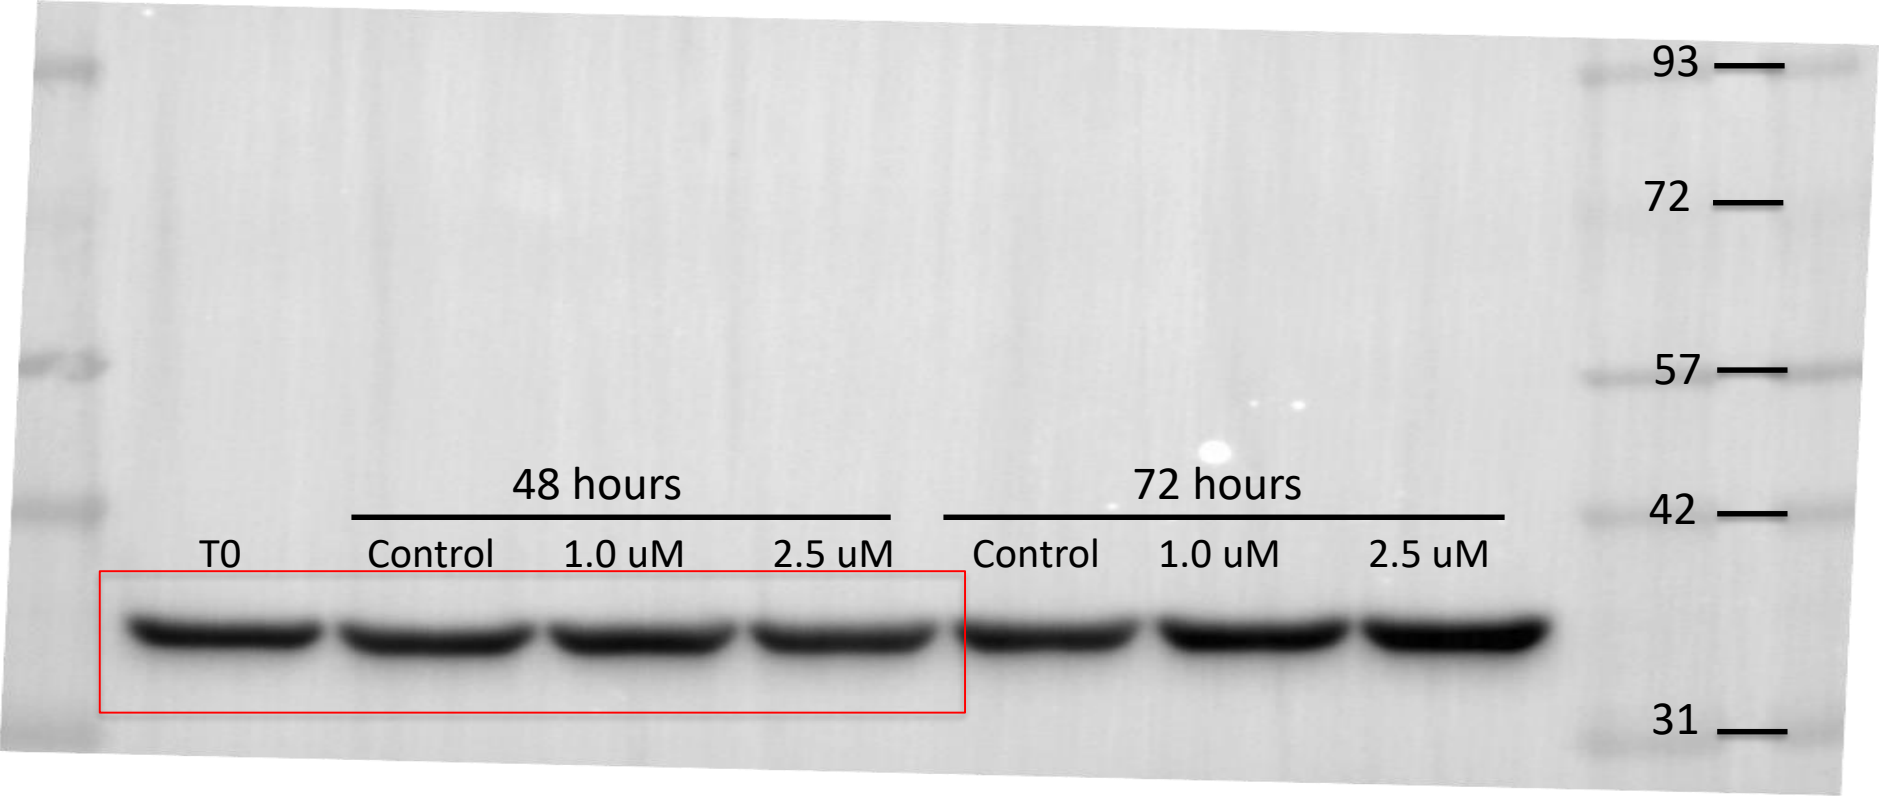

Figure S6. Figure 4C – HMEC15 – set 2 – Expt 1 – Uncropped TASK3 western

Uncropped TASK3 western

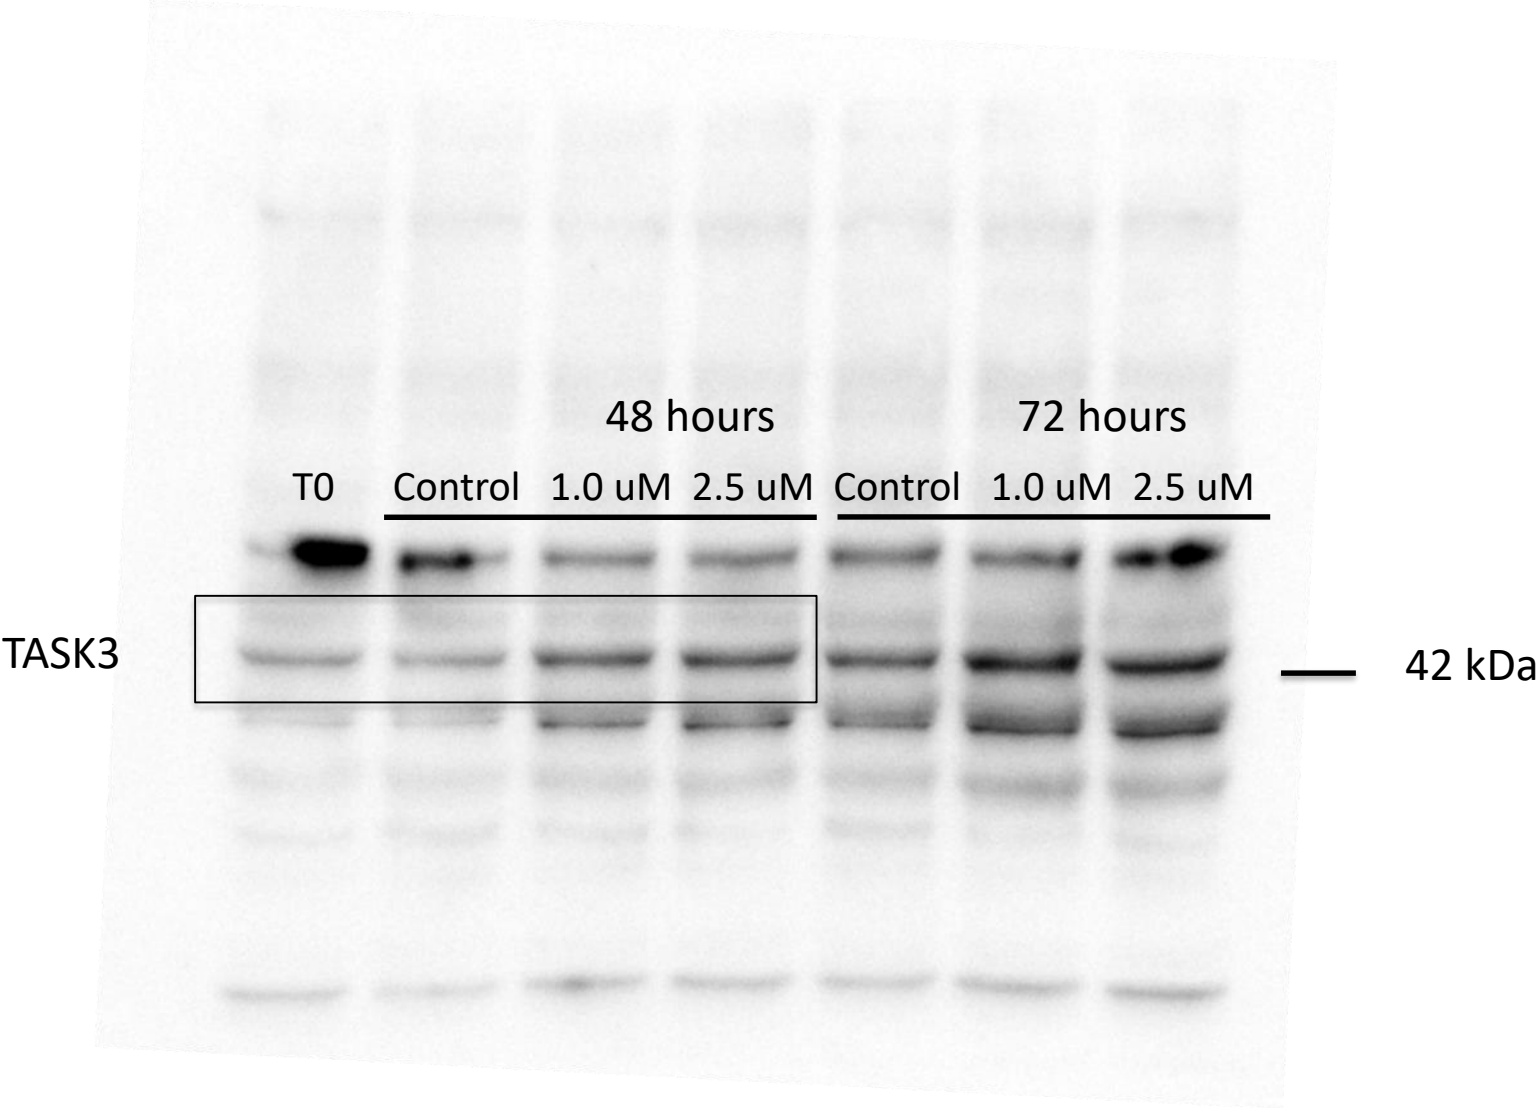

Figure S7. Figure 4C – HMEC15 – set 2 – Expt 1 – Uncropped TASK3 with ladder

Uncropped TASK3 with ladder

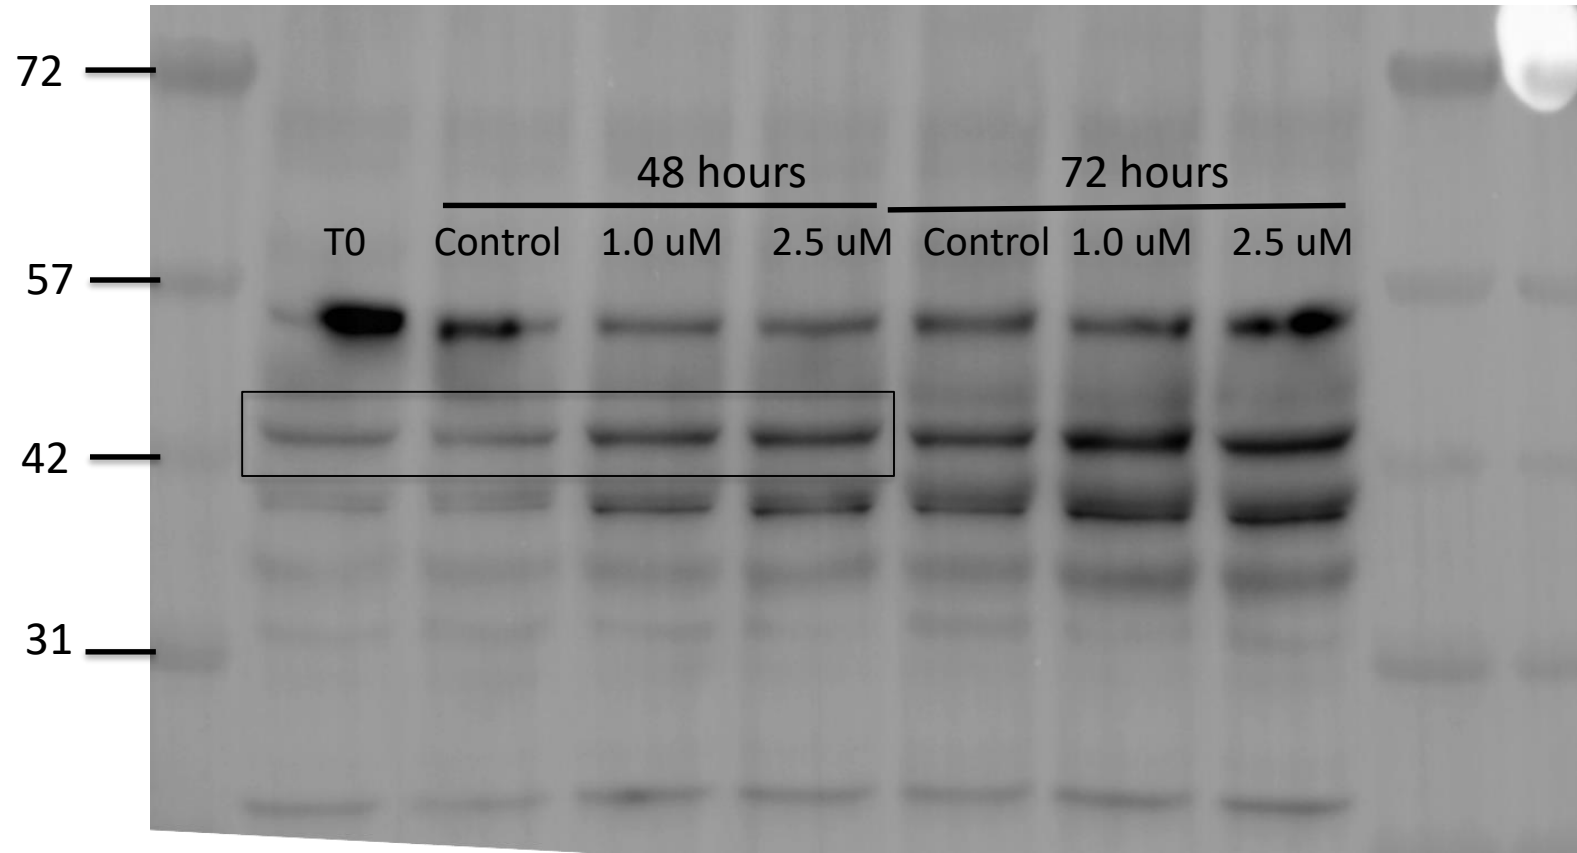

## Uncropped GAPDH

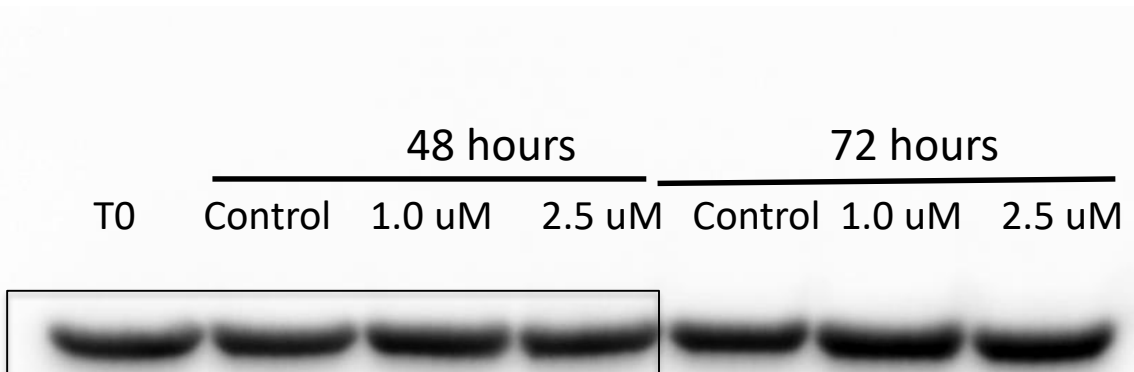

Western blot analysis of GAPDH protein levels. The blot shows bands for GAPDH across seven lanes. The lanes are labeled as follows: T0, 48 hours (Control, 1.0  $\mu$ M, 2.5  $\mu$ M), and 72 hours (Control, 1.0  $\mu$ M, 2.5  $\mu$ M). A box highlights the first four lanes (T0, 48 hours Control, 48 hours 1.0  $\mu$ M, and 48 hours 2.5  $\mu$ M). The GAPDH protein levels appear consistent across all lanes, indicating equal protein loading.

| Time Point | Treatment   | GAPDH Band Intensity (approximate) |
|------------|-------------|------------------------------------|
| T0         | -           | Strong                             |
| 48 hours   | Control     | Strong                             |
|            | 1.0 $\mu$ M | Strong                             |
|            | 2.5 $\mu$ M | Strong                             |
| 72 hours   | Control     | Strong                             |
|            | 1.0 $\mu$ M | Strong                             |
|            | 2.5 $\mu$ M | Strong                             |

# Uncropped GAPDH

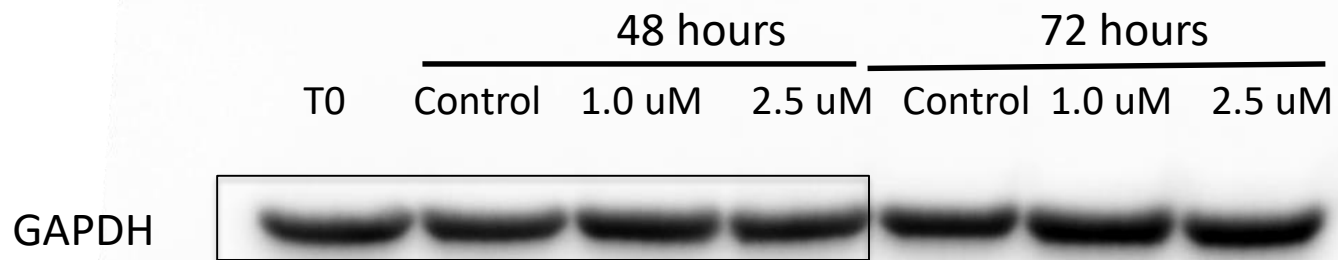



Figure S9. Figure 4C – HMEC15 – set 2 – Exp 1 – Uncropped GAPDH

Uncropped GAPDH

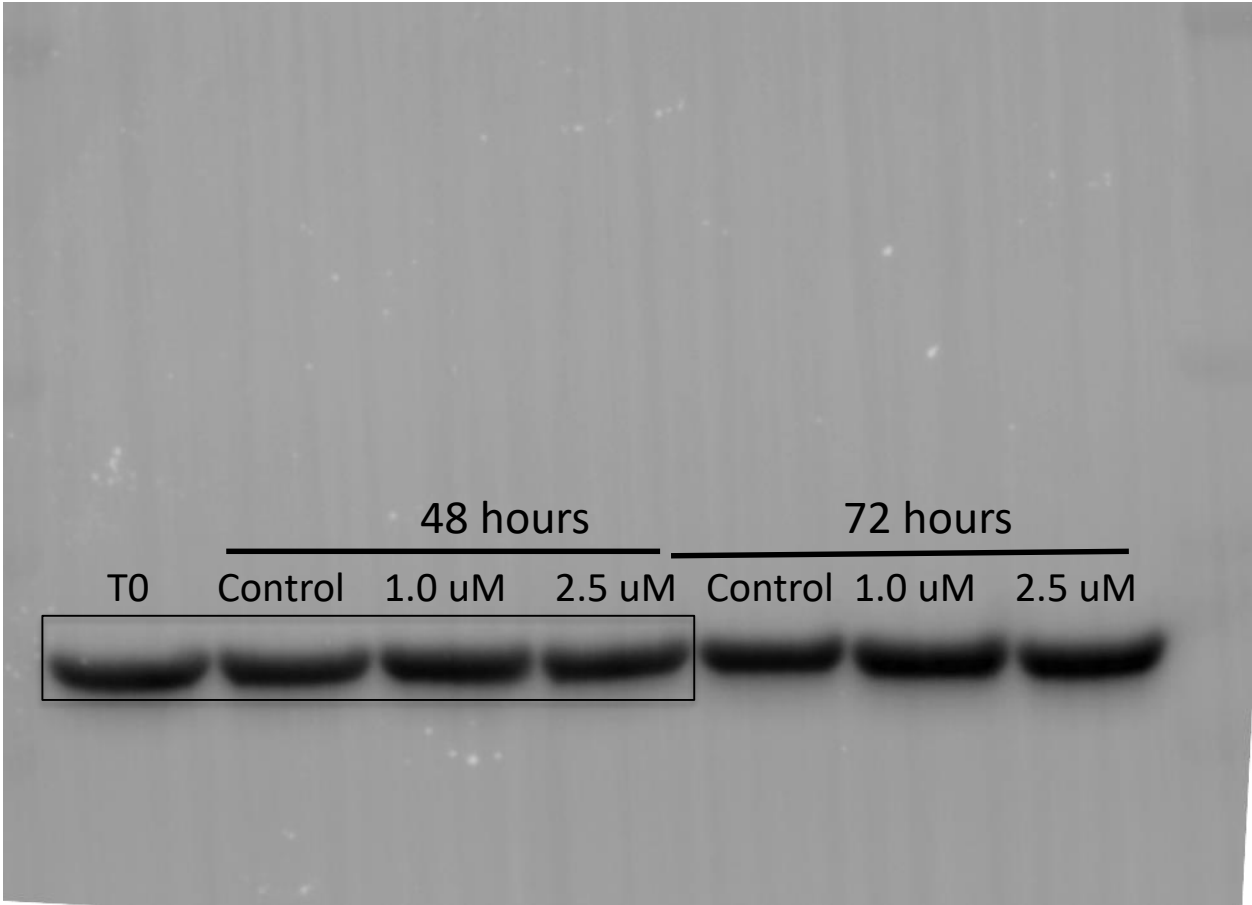

Figure S10. Figure 4C – HMEC15 – set 3 – Exp 3 – TASK3 original blot

# TASK3 original blot

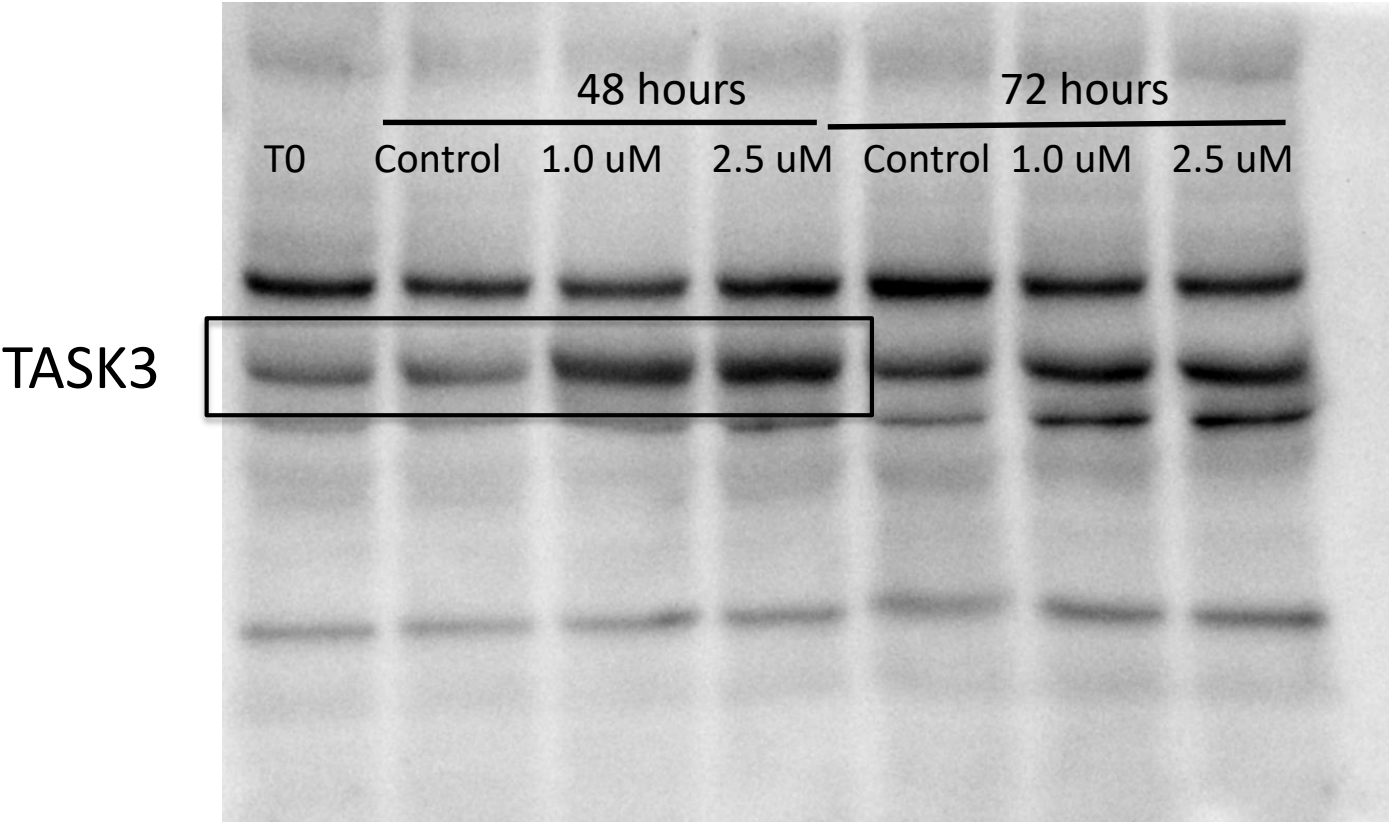



Figure S12. Figure 4C – HMEC15 – set 3 – Ext 3 – HMEC15 treated with 5-AzC for up to 48 hours, GAPDH

HMEC15 treated with 5-AzC for up to 48 hours, GAPDH

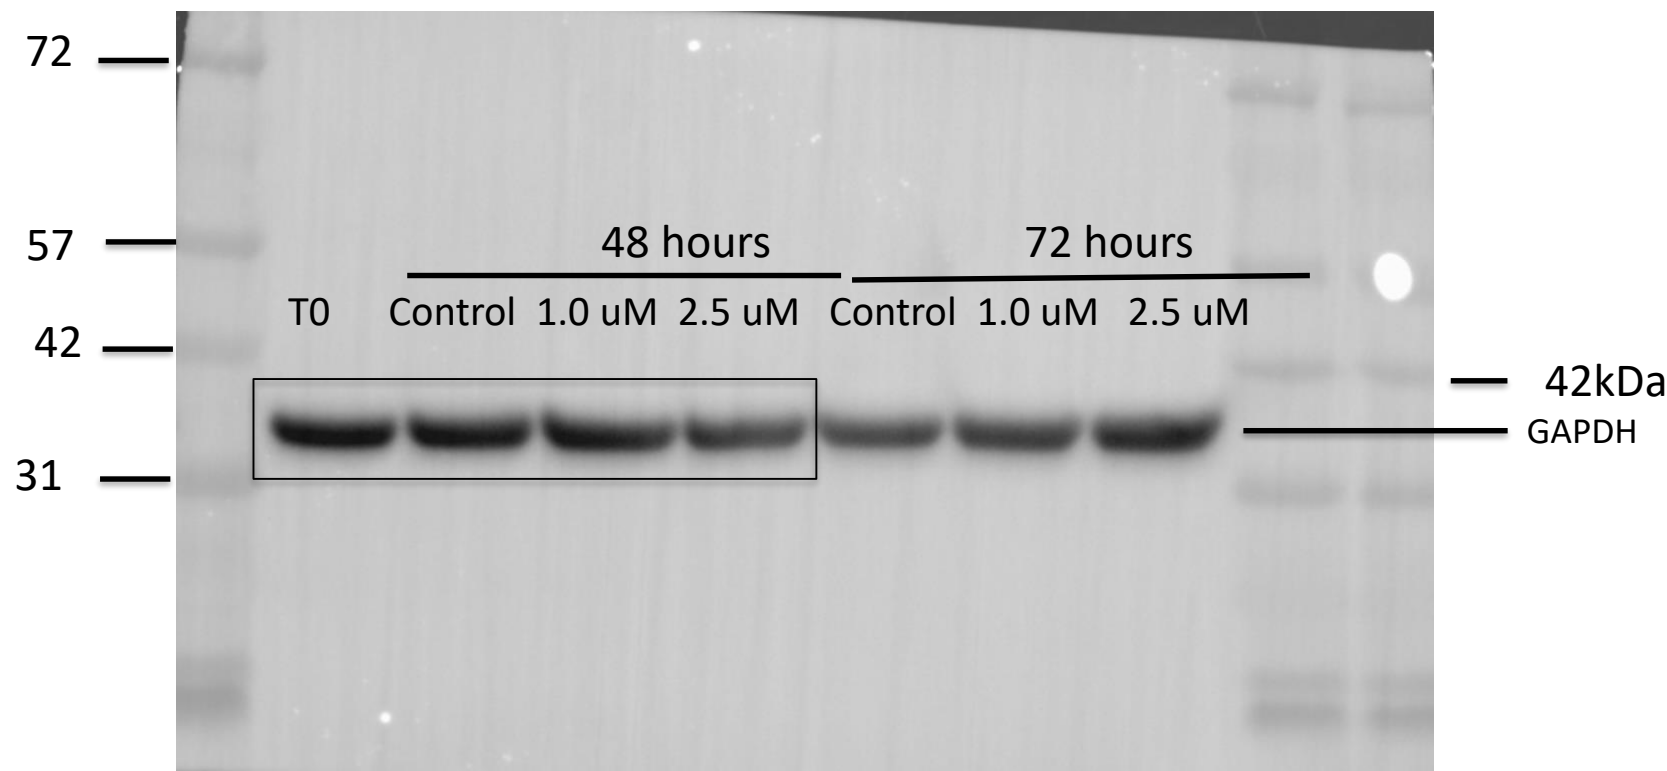

Figure S13. Figure 4C– HMEC15 – set 3 – Expt 3 – GAPDH original blot

# GAPDH original blot

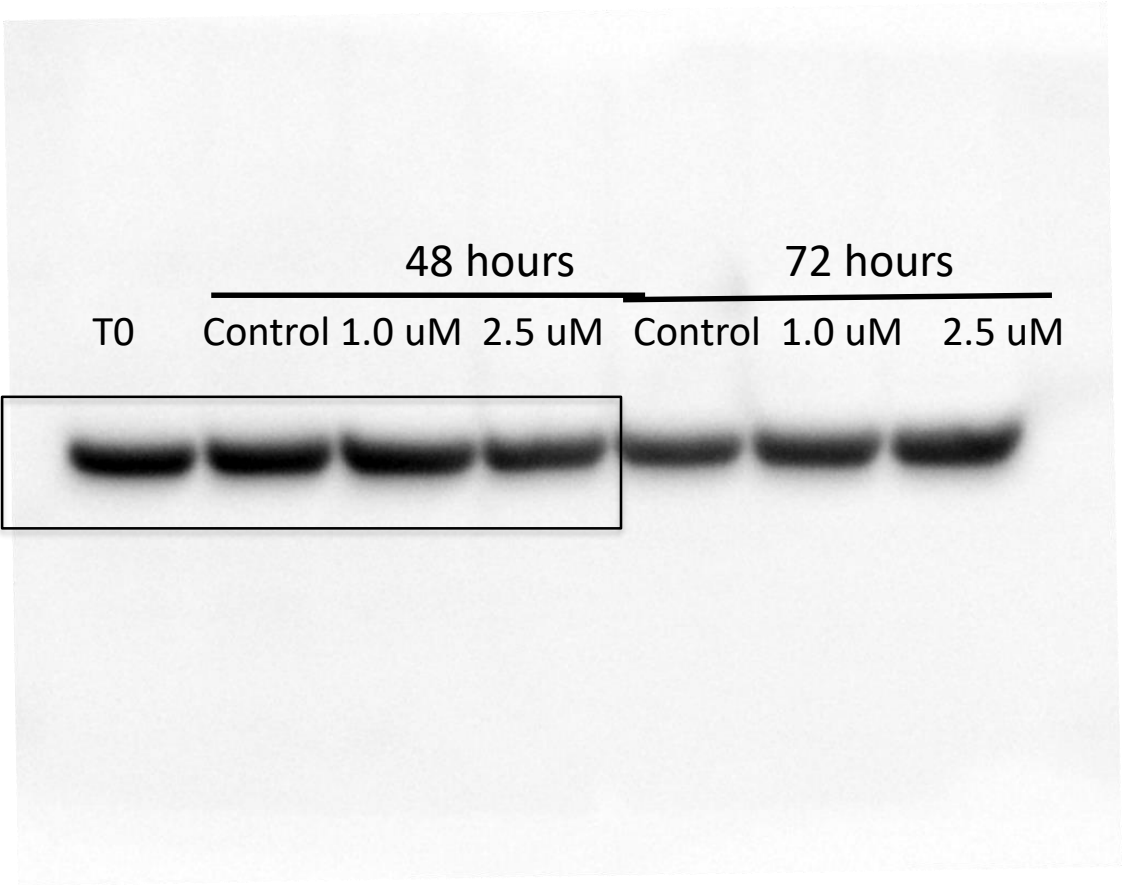

Figure S14. Figure 5A

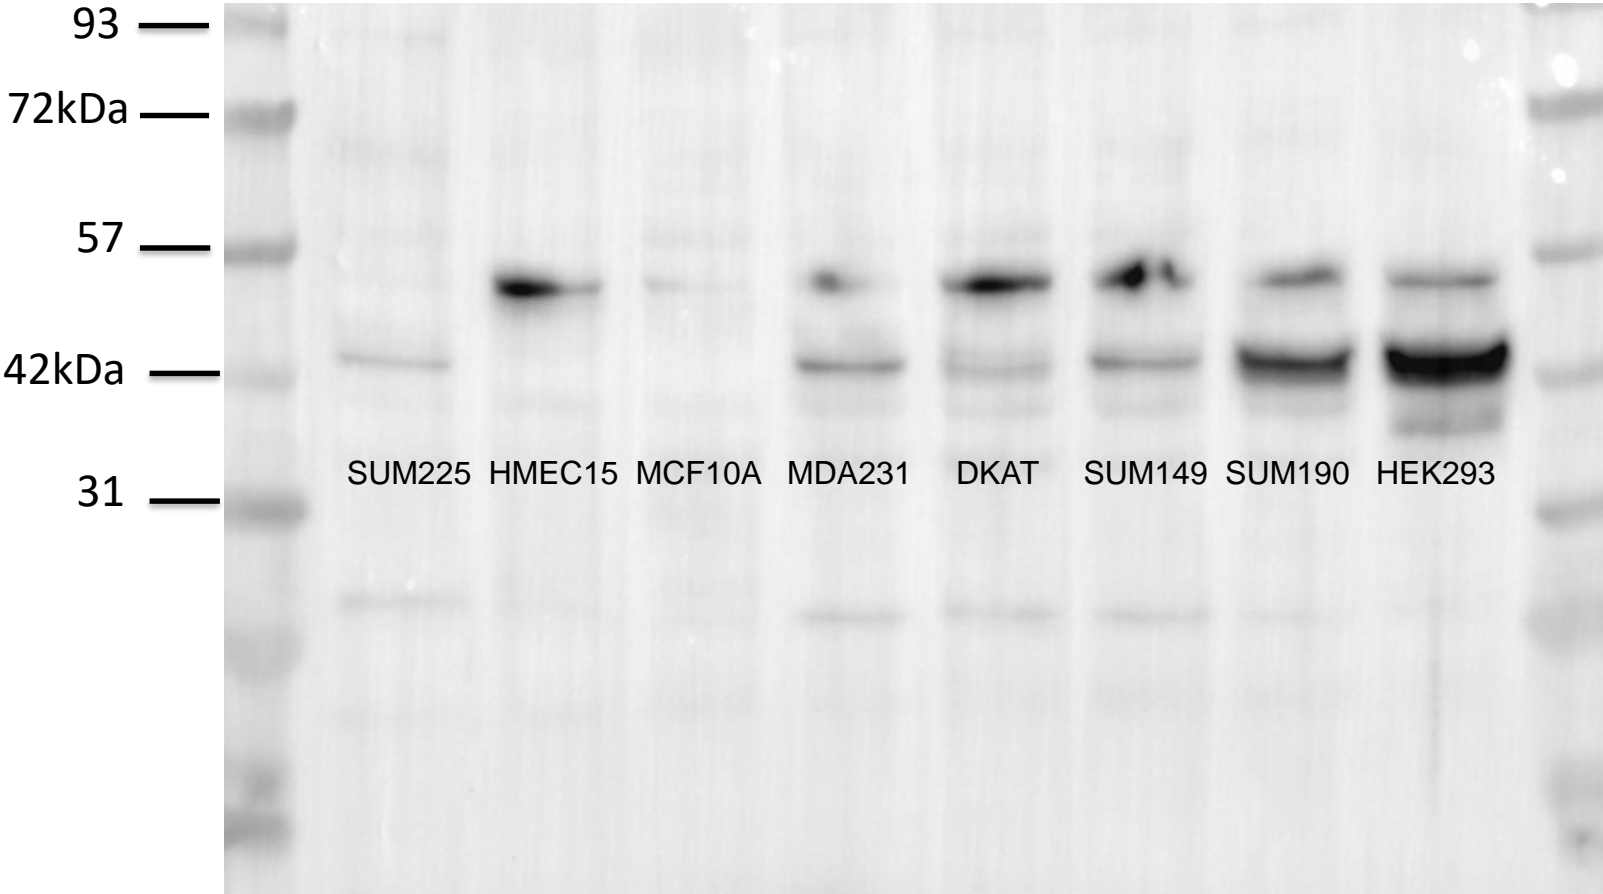

Figure S15. Figure 5A – GAPDH

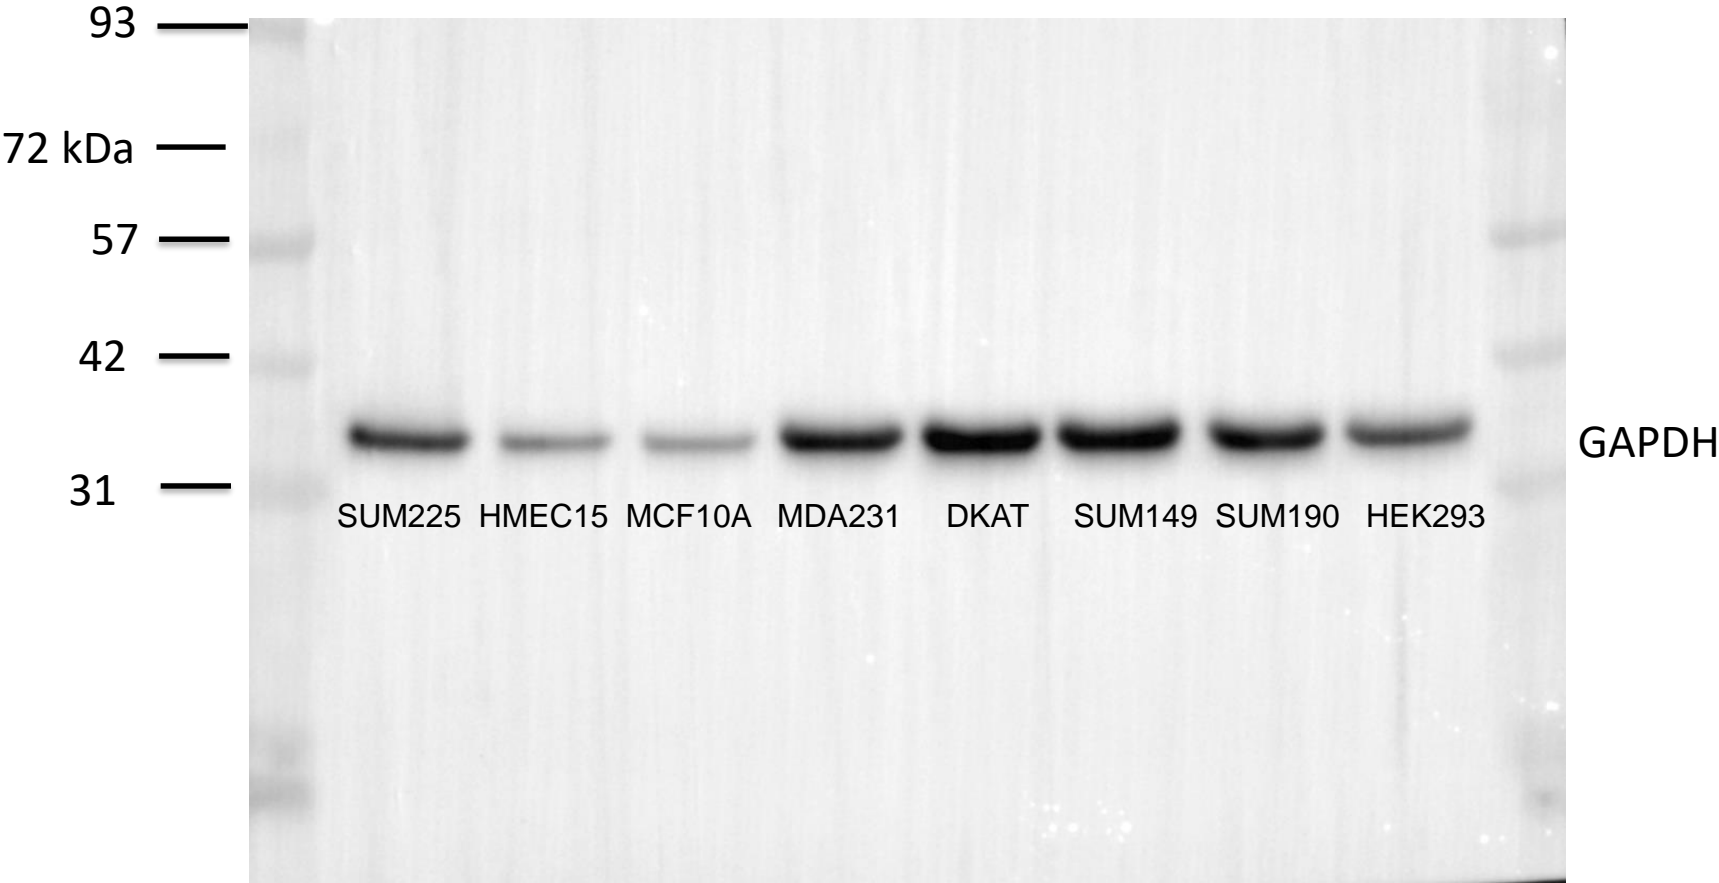

Figure S16. Current Figure 5B and former Figure 6A – TASK3 Flag

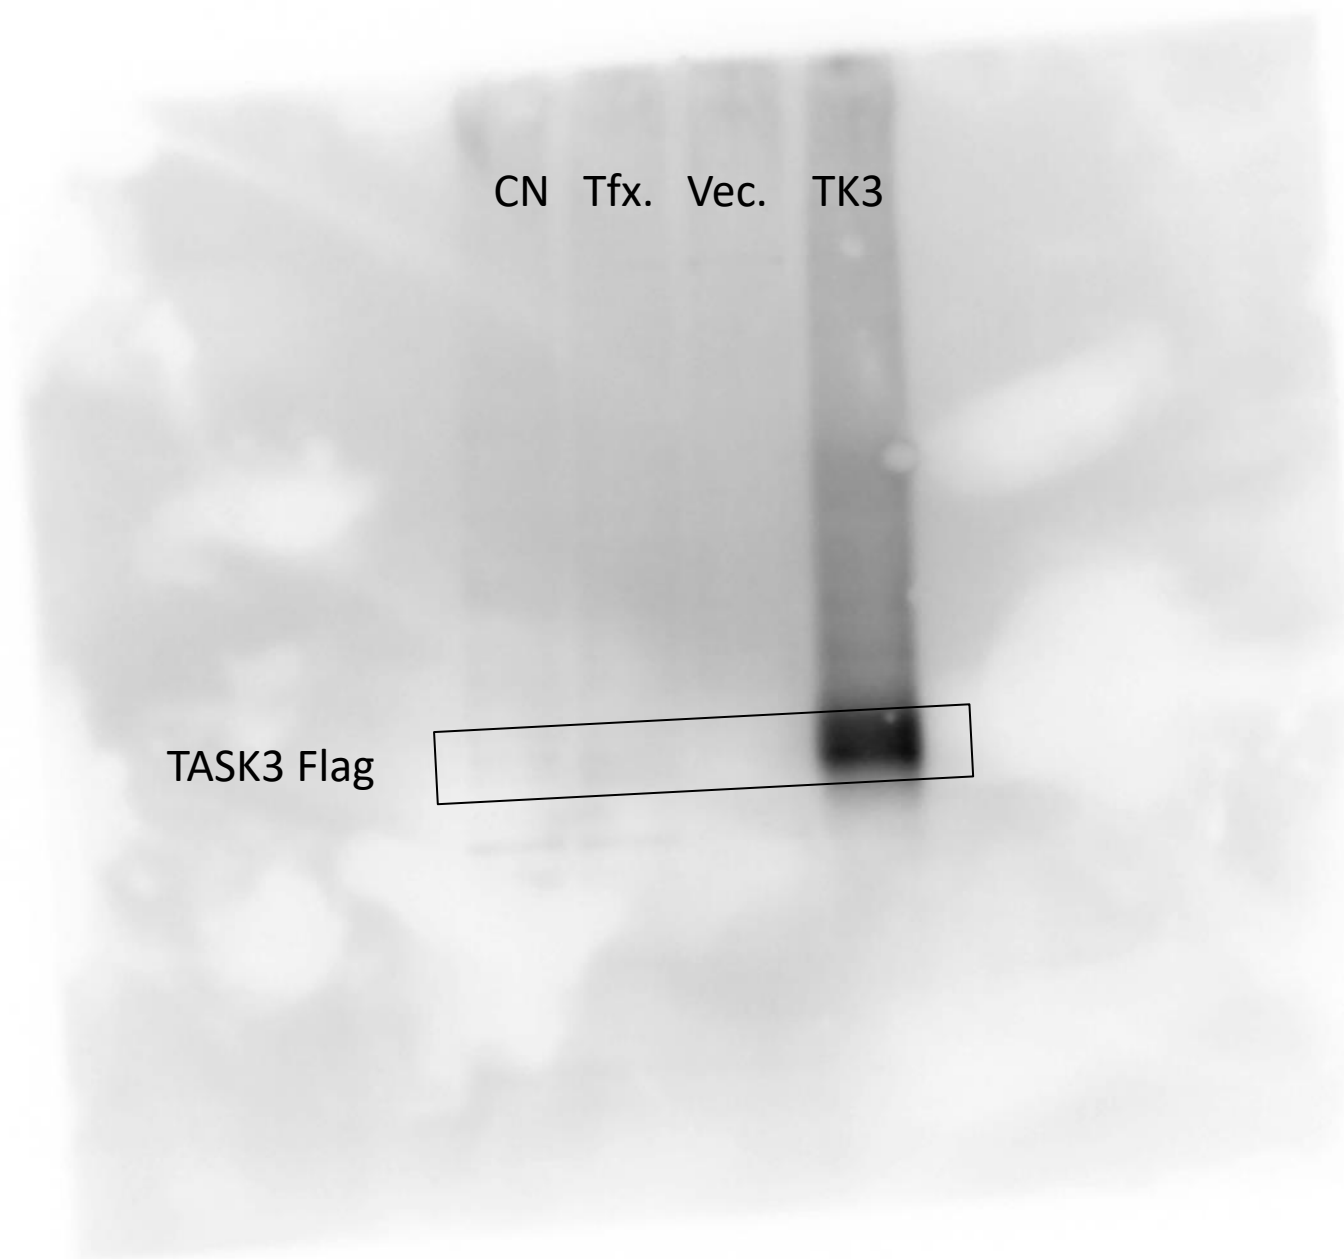



Figure S17. Current Figure 5B and former Figure 6A – TASK3 – 42KDa

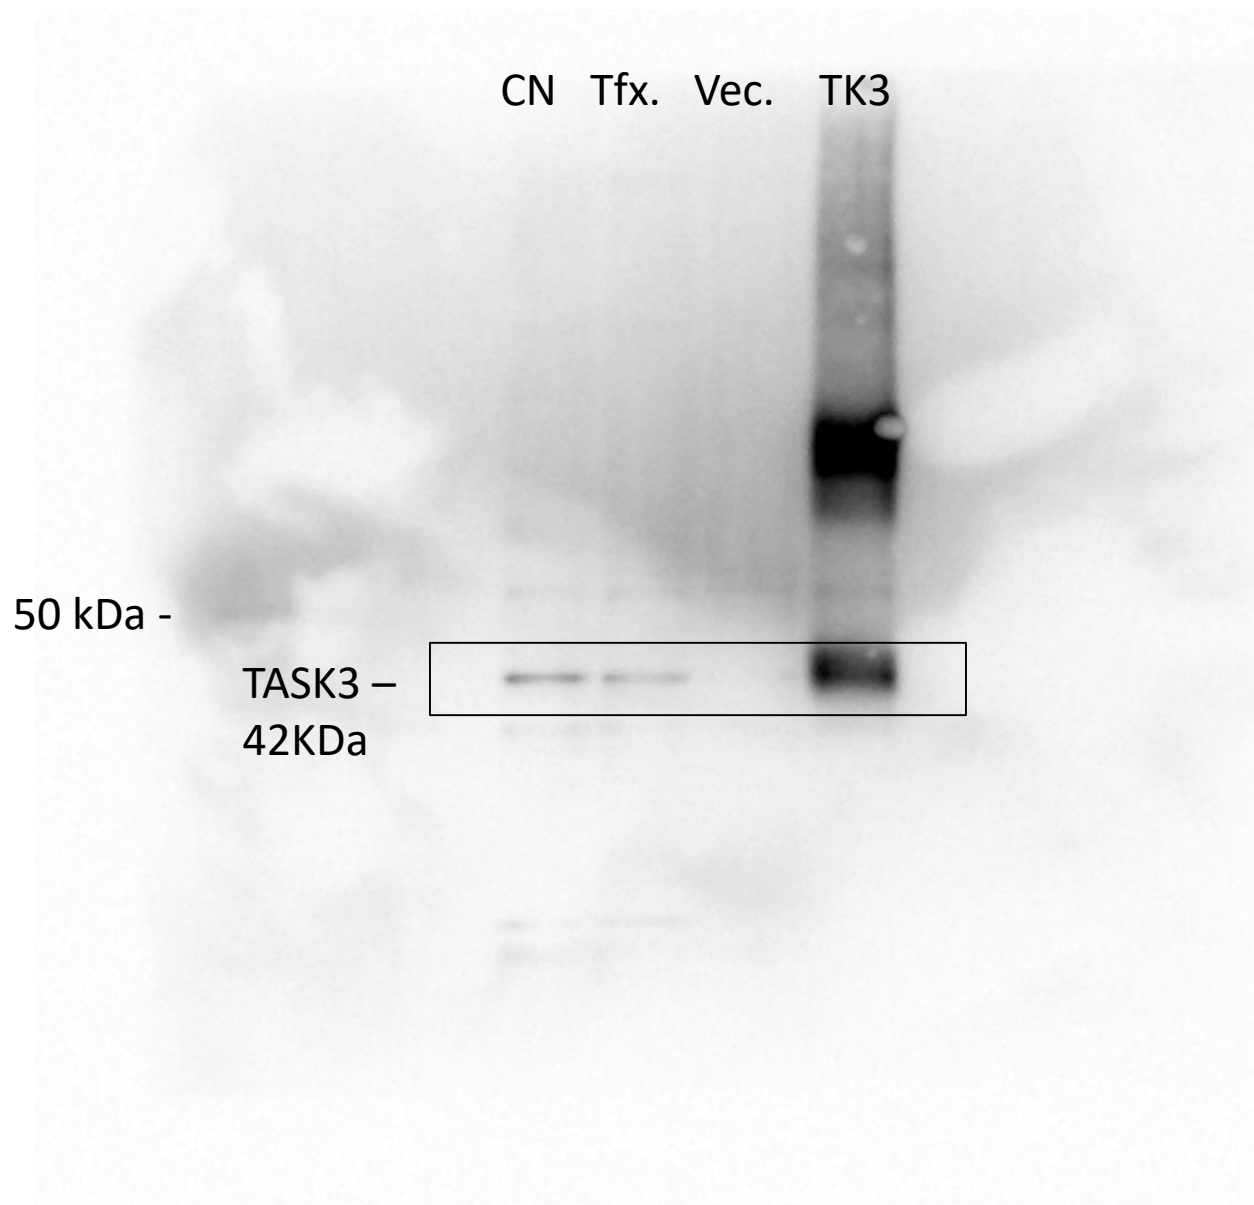

Figure S18. Figure 5C – expt 1 – MCF10A Blobe – KCNK9 Flag-Tag +

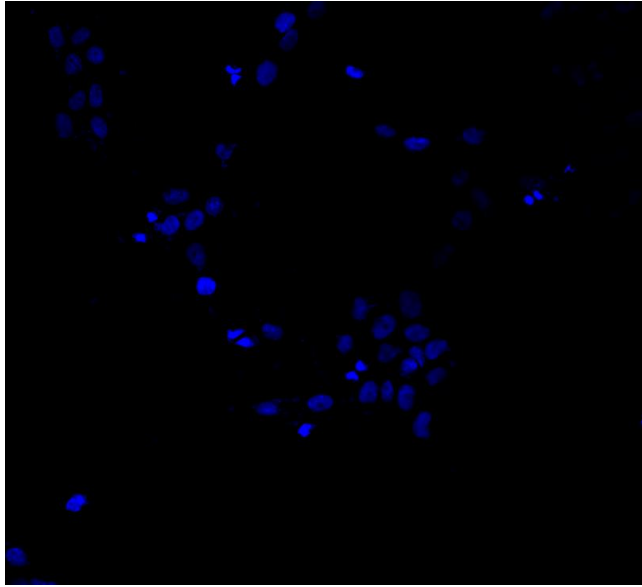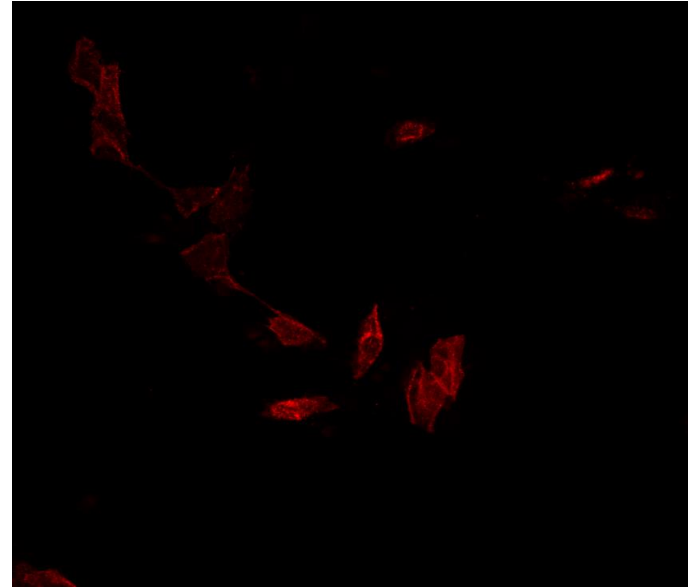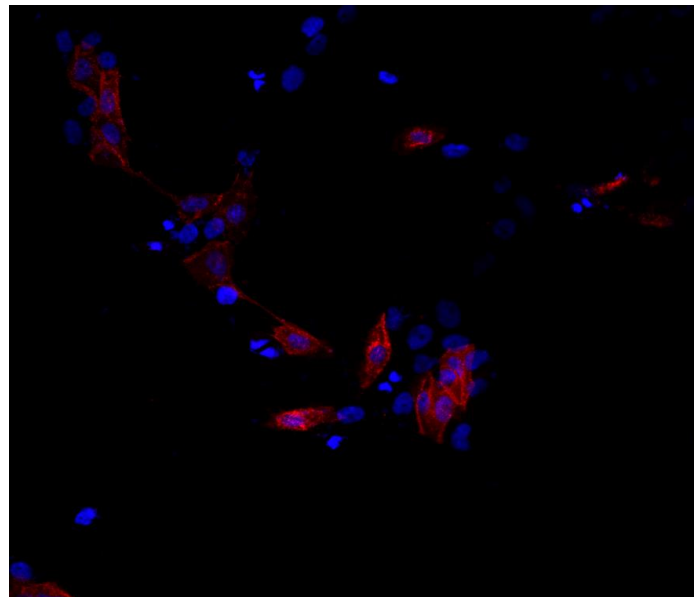

20X

Figure S18. Figure 5C – expt 1 – MCF10A Blobe – KCNK9 Flag-Tag +

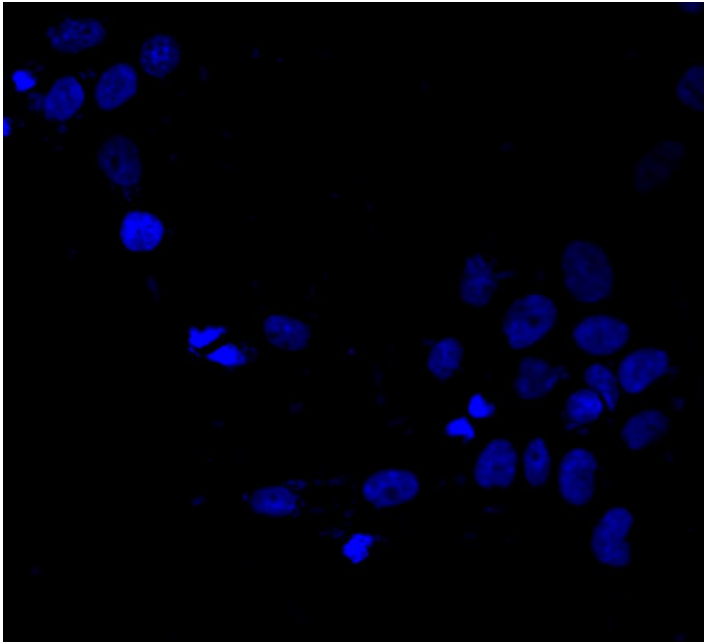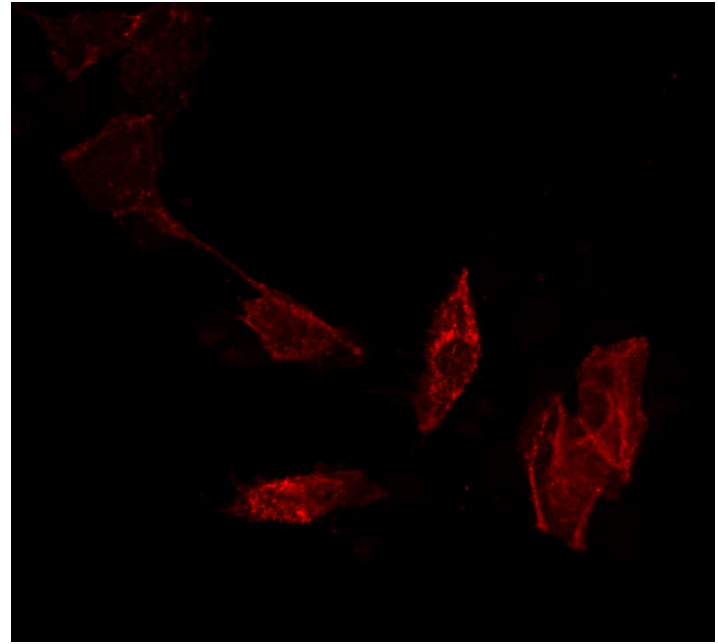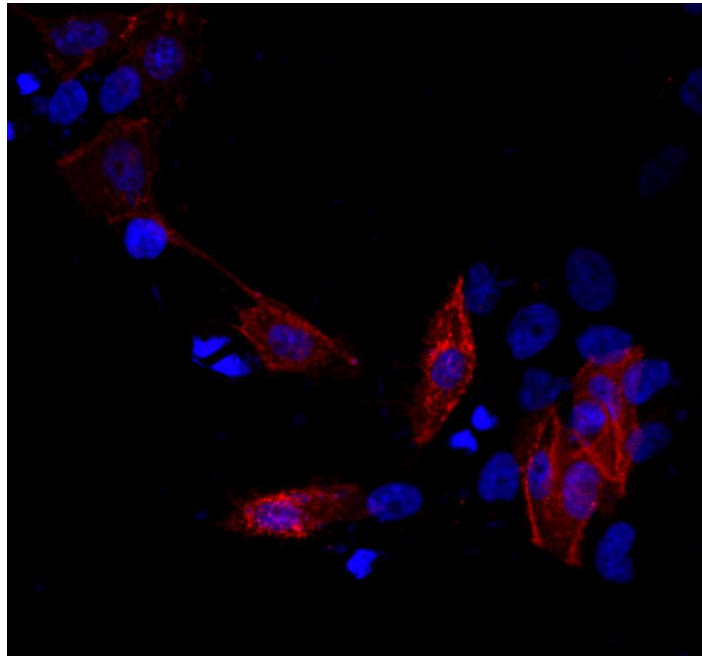

20X (x) 2X digital zoom

Figure S18. Figure 5C – expt 1 – MCF10A Blobe – KCNK9 Flag-Tag +

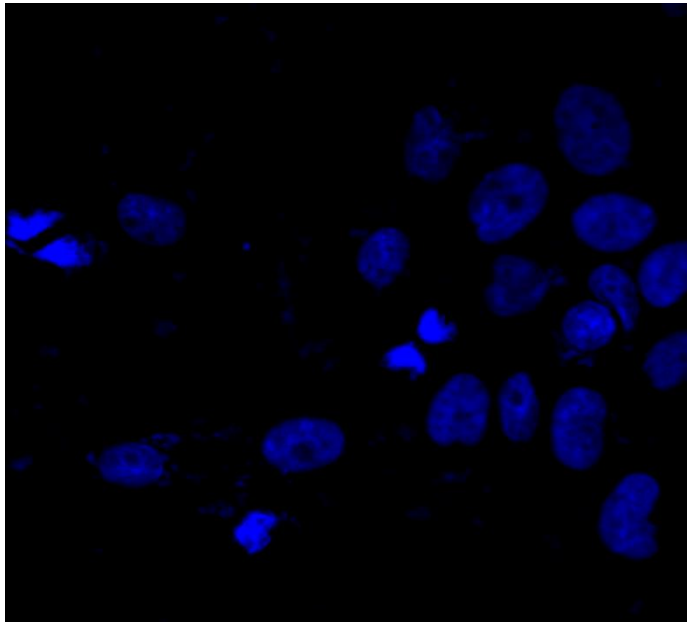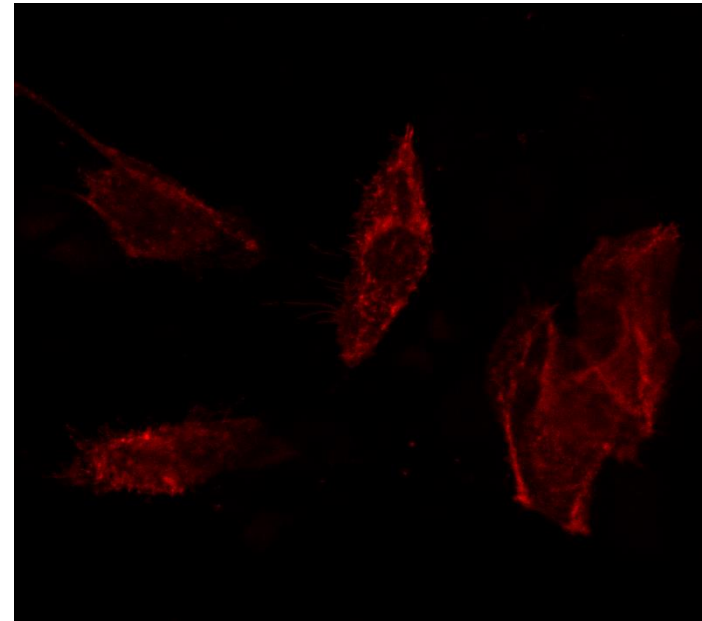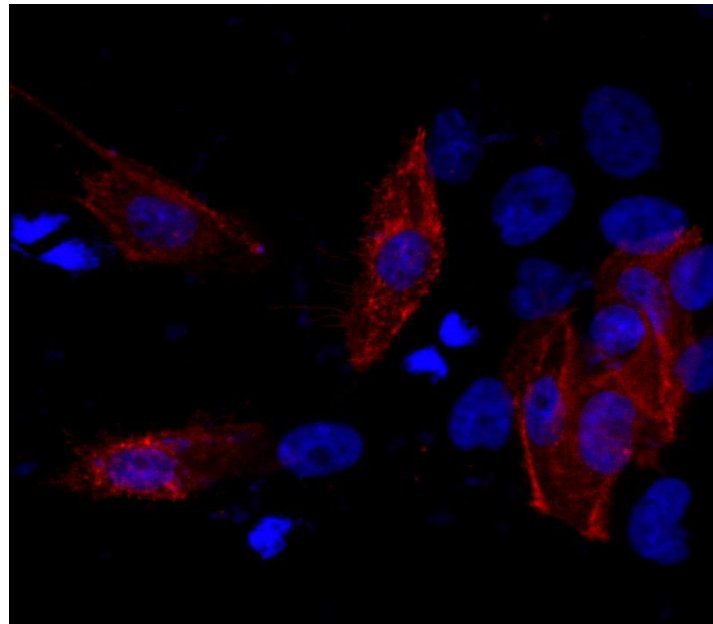

20X (x) 3X digital zoom

Figure S19. Figure 5C – expt 1 – MCF10A Blobe – Empty Flag-Tag +

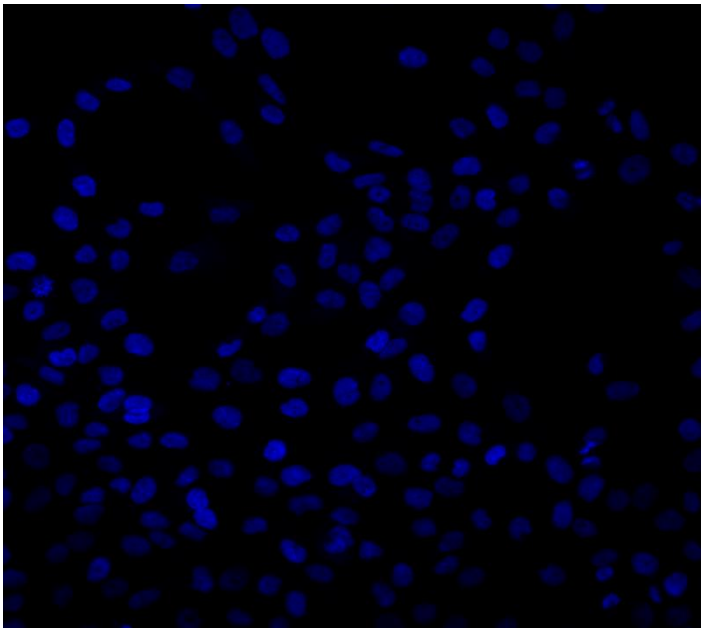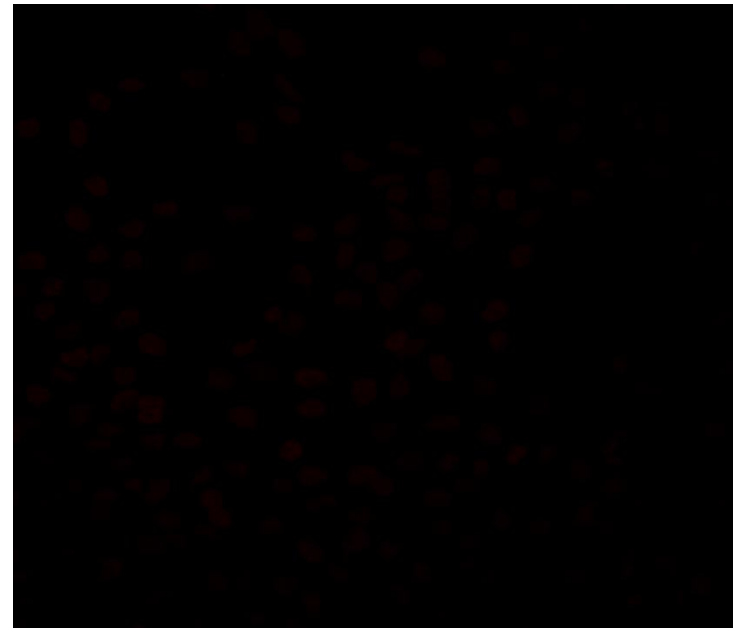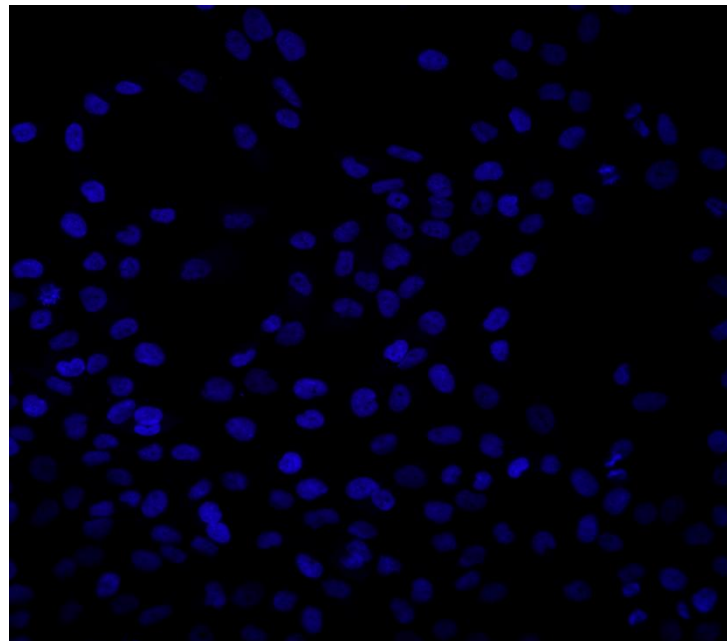

20X

Figure S19. Figure 5C – expt 1 – MCF10A Blobe – Empty Flag-Tag +

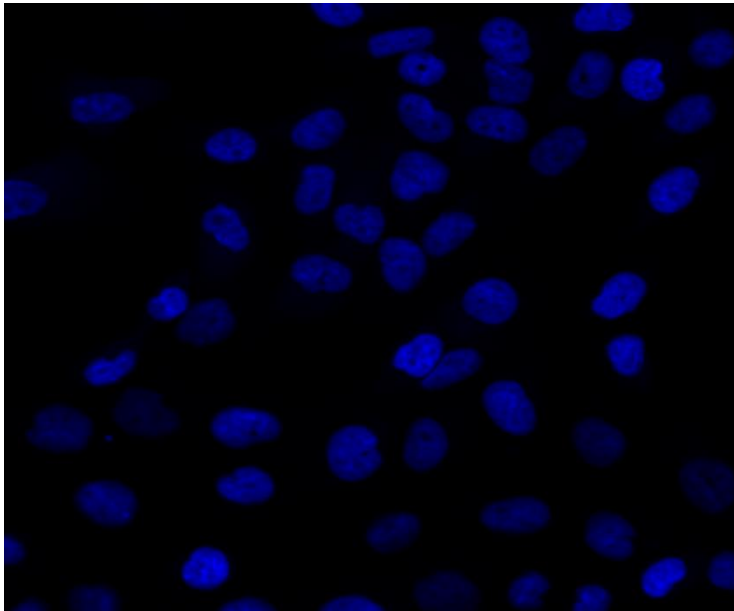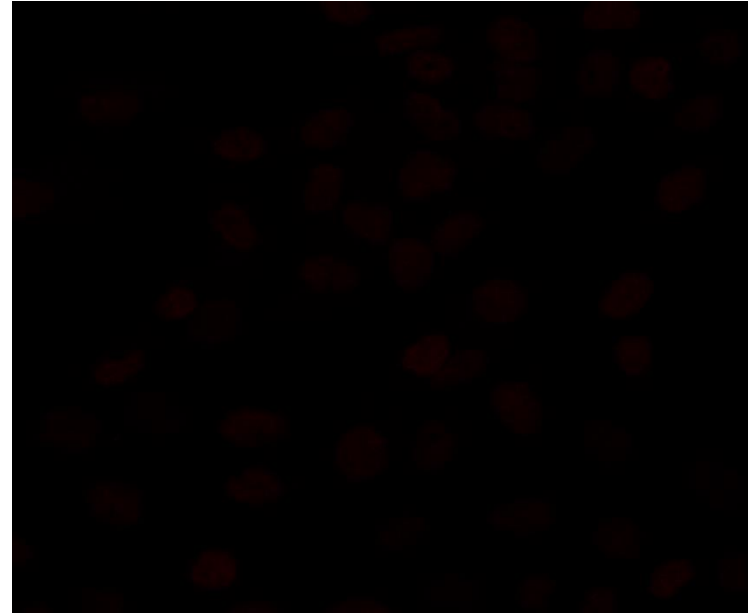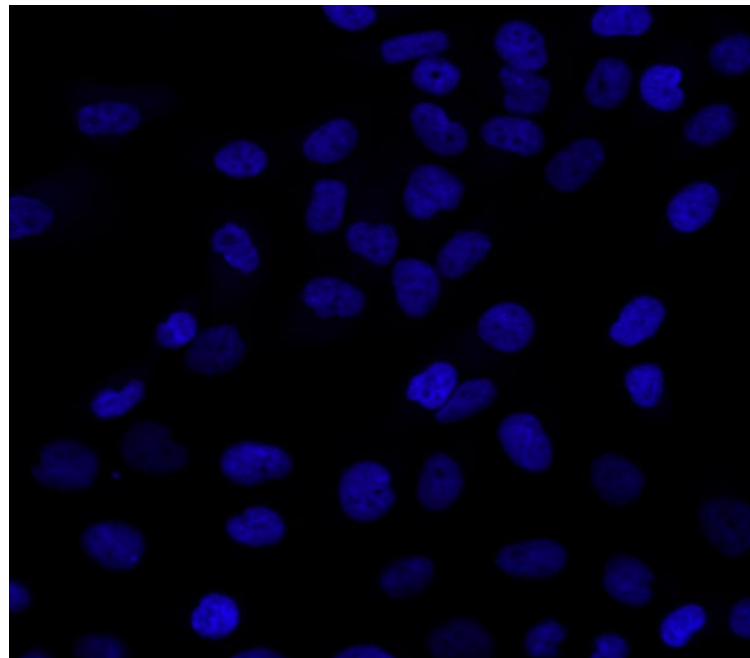

20X (x) 2X digital zoom

Figure S19. Figure 5C – expt 1 – MCF10A Blobe – Empty Flag-Tag +

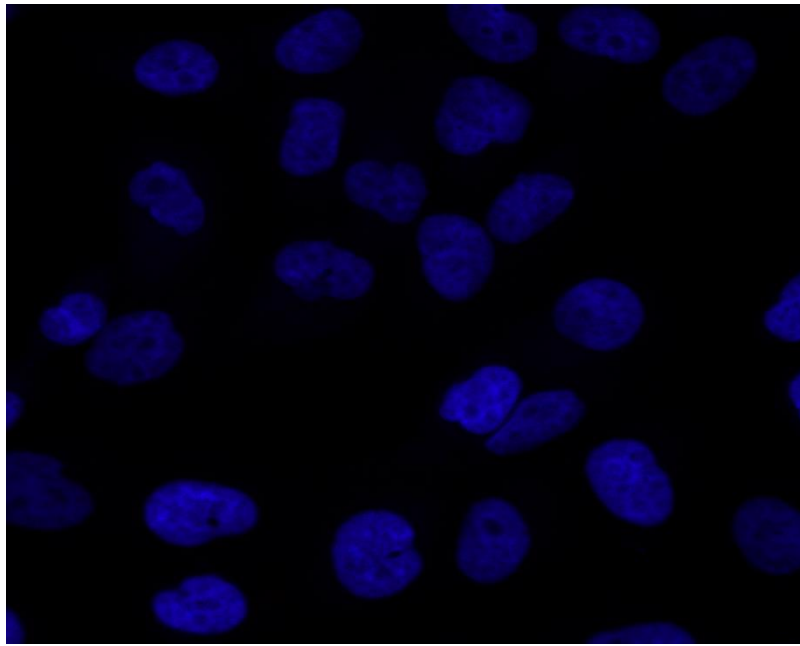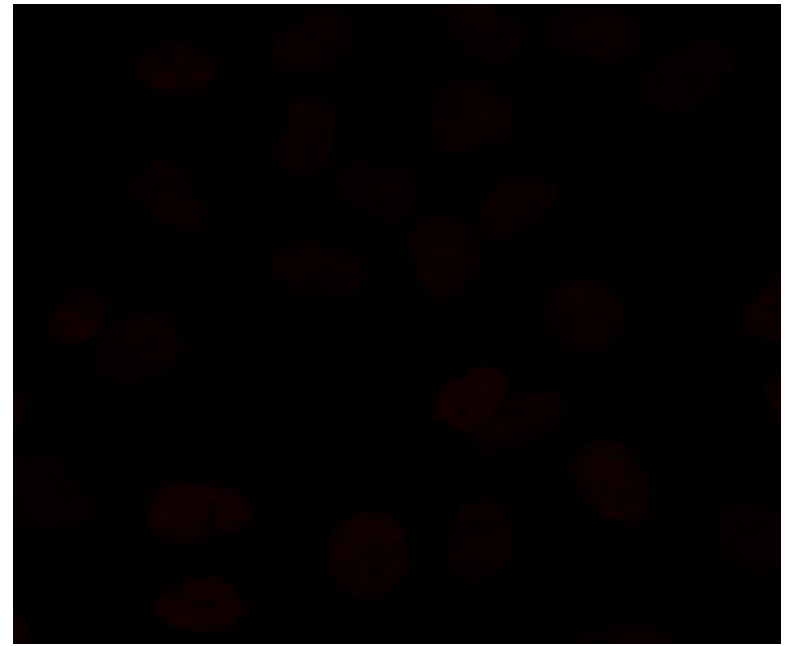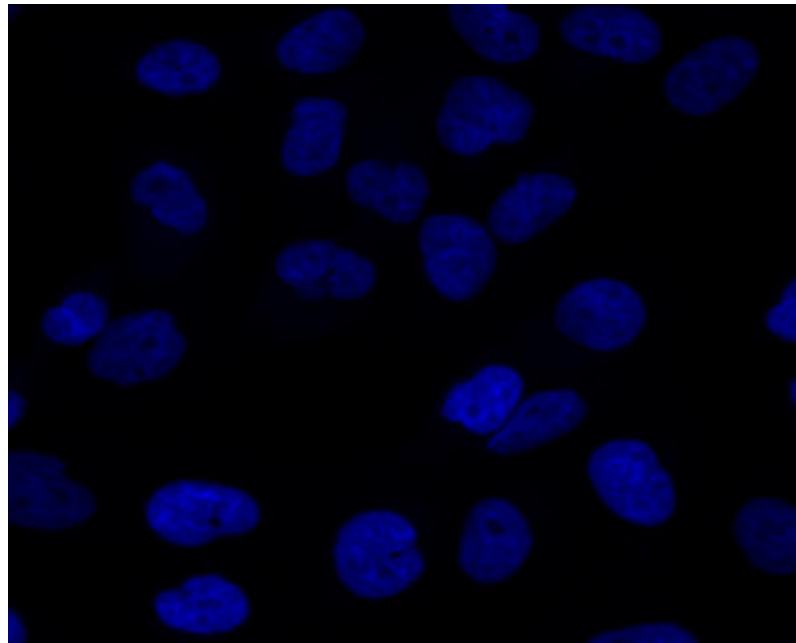

20X (x) 3X digital zoom

Figure S20. Figure 5C – expt 1 – MCF10A Blobe – Transfection Reagent alone +

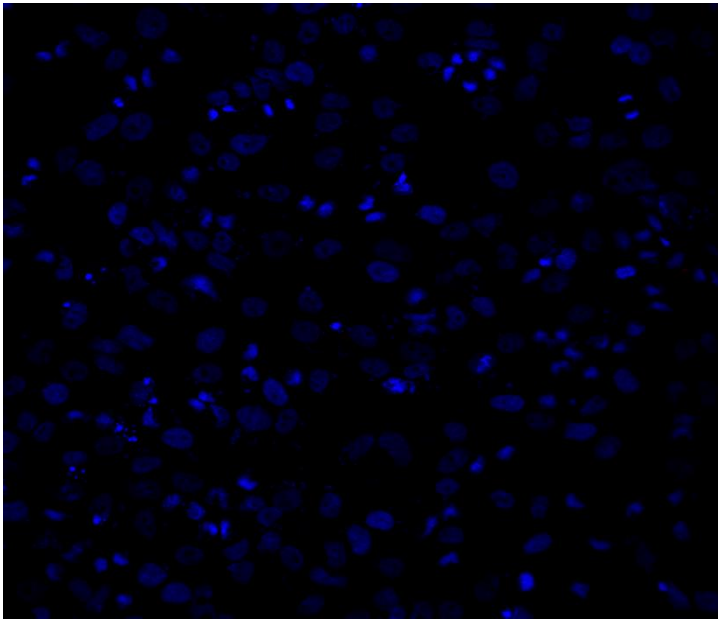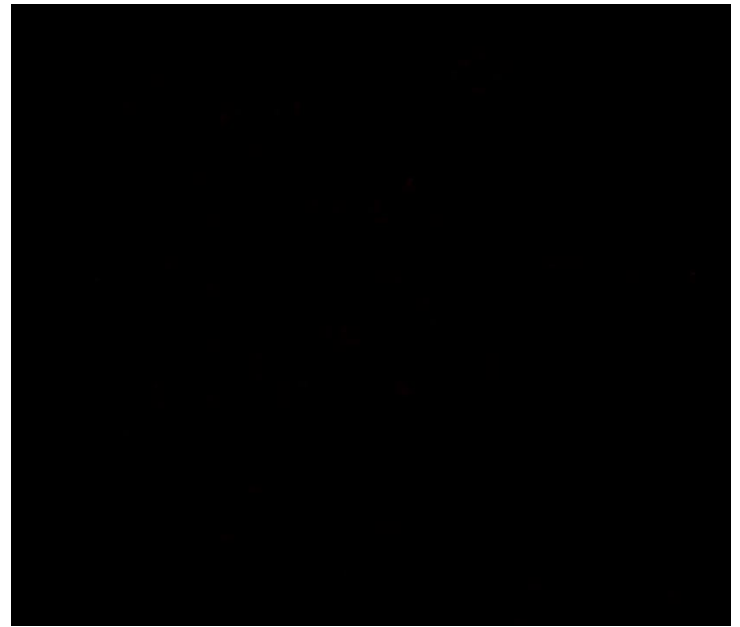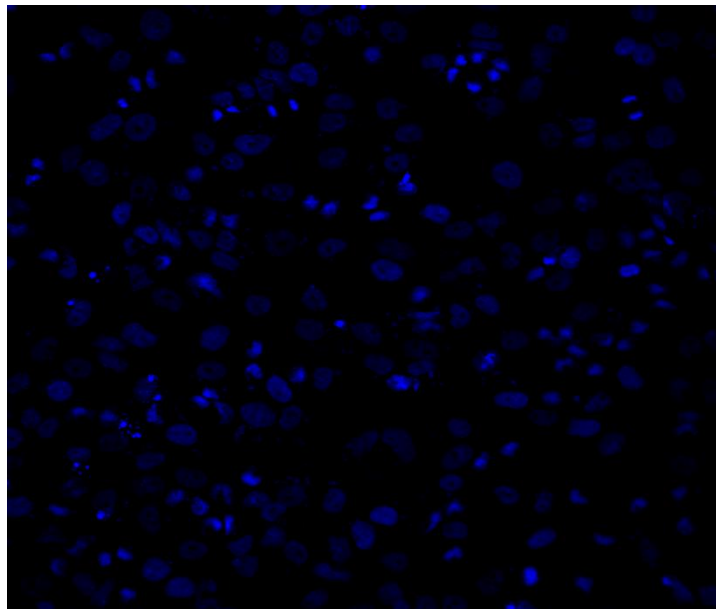

20X



Figure S20. Figure 5C – expt 1 – MCF10A Blobe – Transfection Reagent alone +

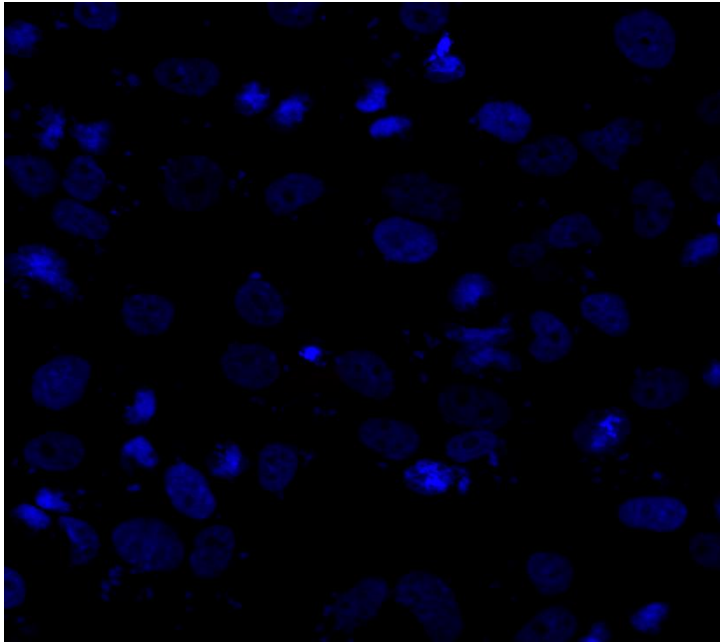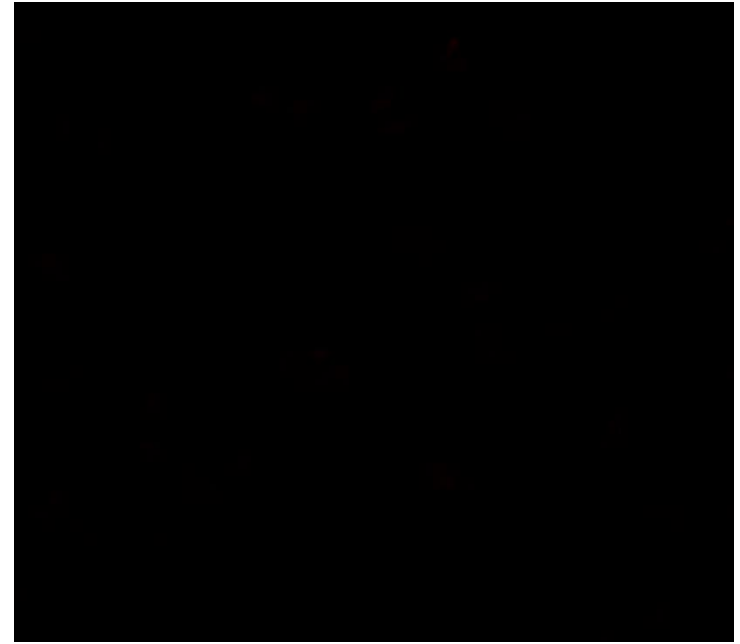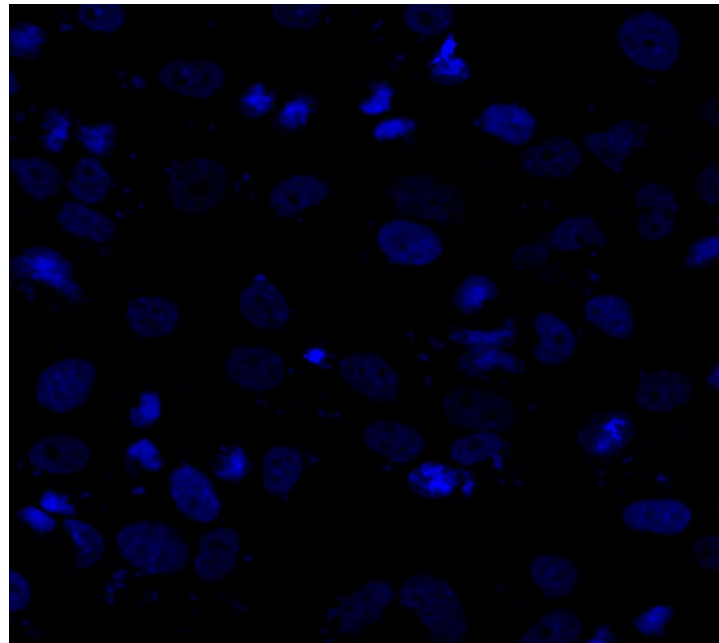

20X (x) 2X digital zoom

Figure S20. Figure 5C – expt 1 – MCF10A Blobe – Transfection Reagent alone +

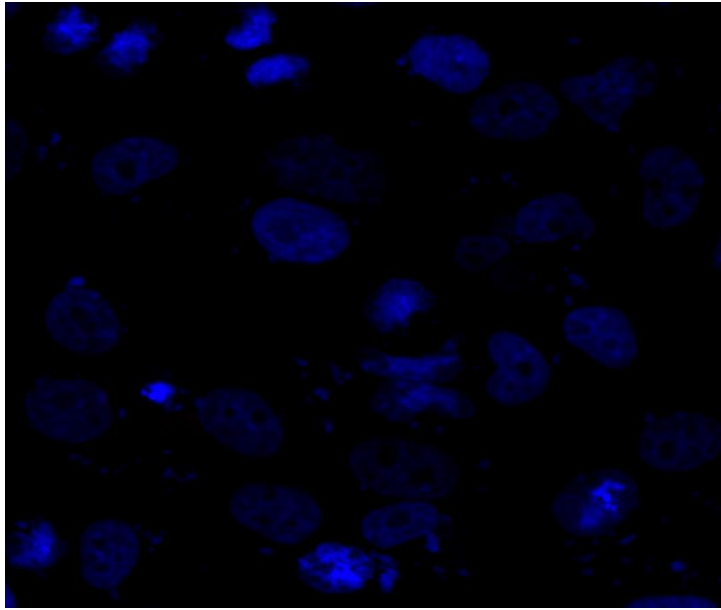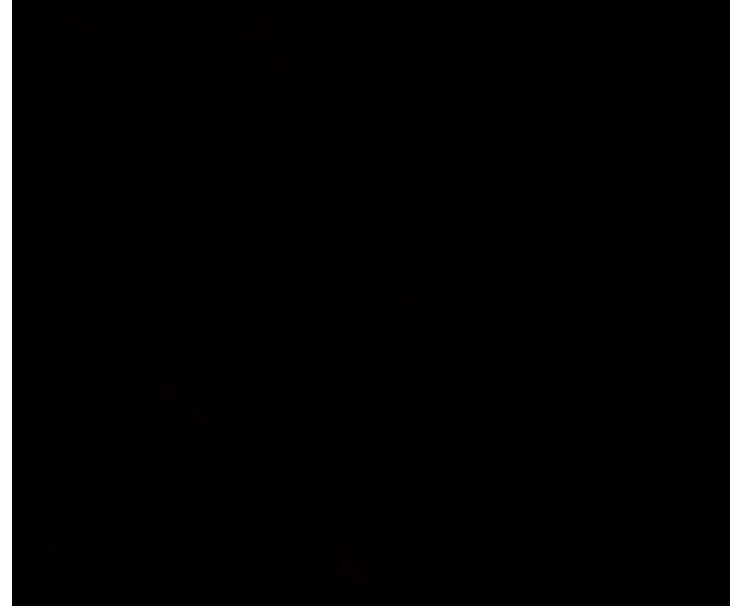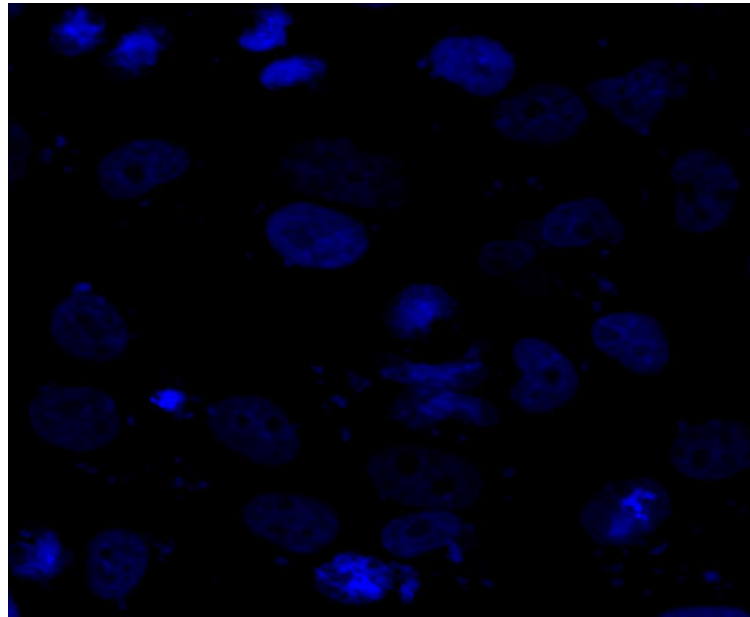

20X (x) 3X digital zoom

Figure S21. Figure 5C – expt 1 – MCF10A Blobe – Control/No Transfection +

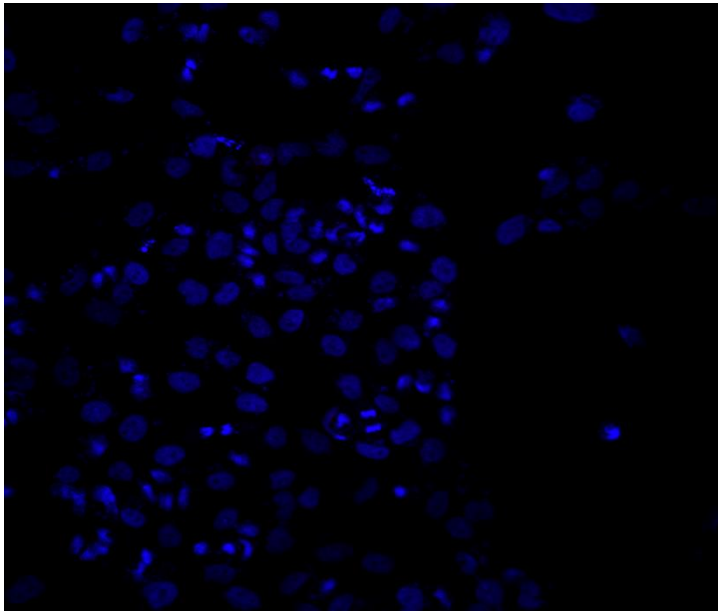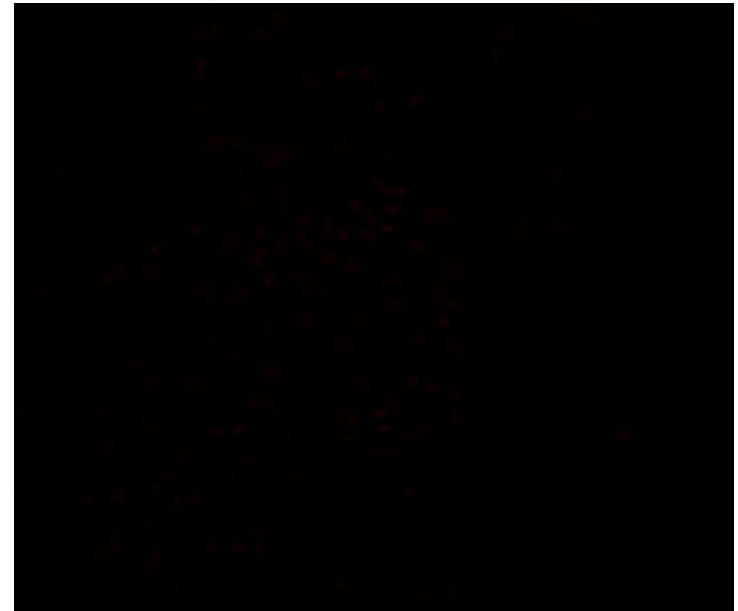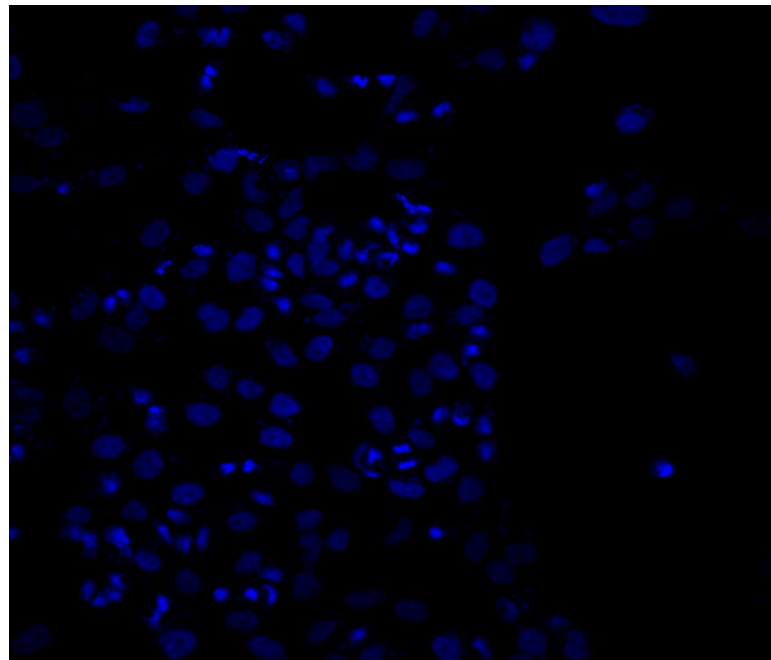

20X

Figure S21. Figure 5C – expt 1 – MCF10A Blobe – Control/No Transfection +

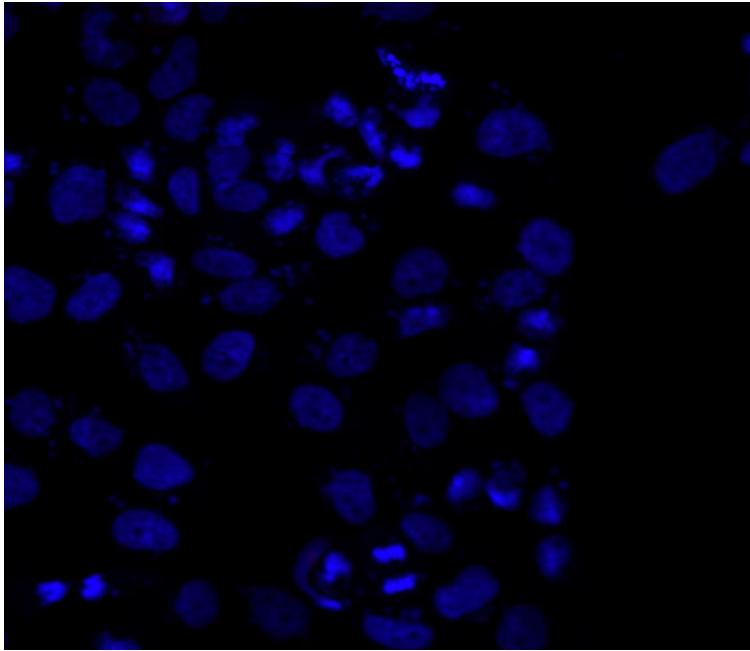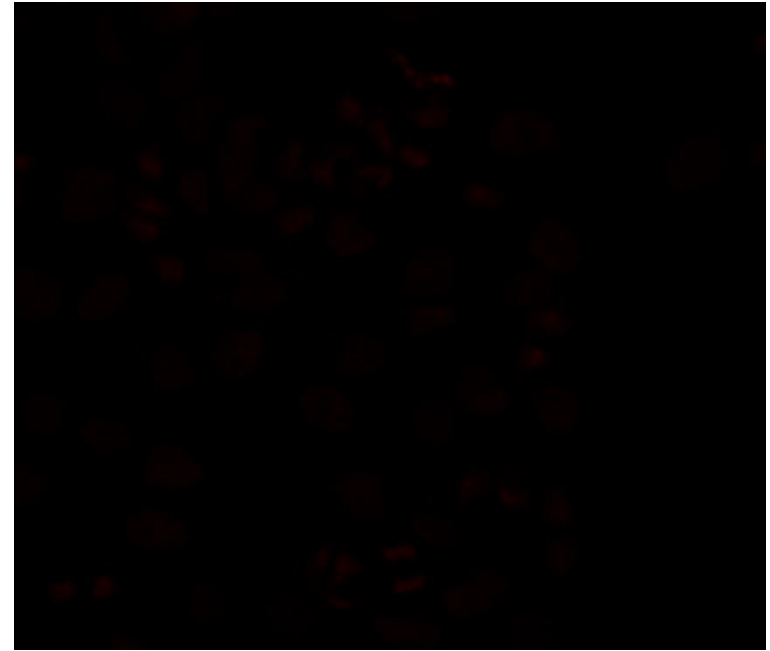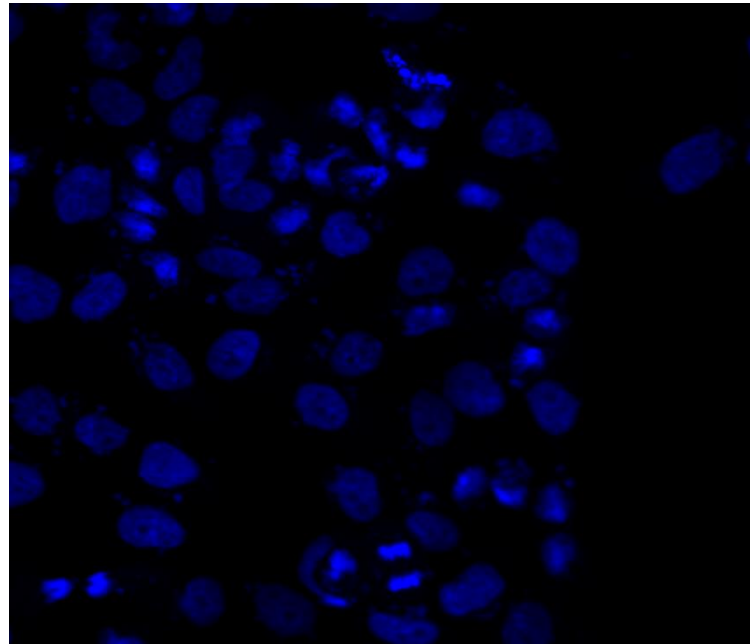

20X (x) 2X digital zoom

Figure S21. Figure 5C – expt 1 – MCF10A Blobe – Control/No Transfection +

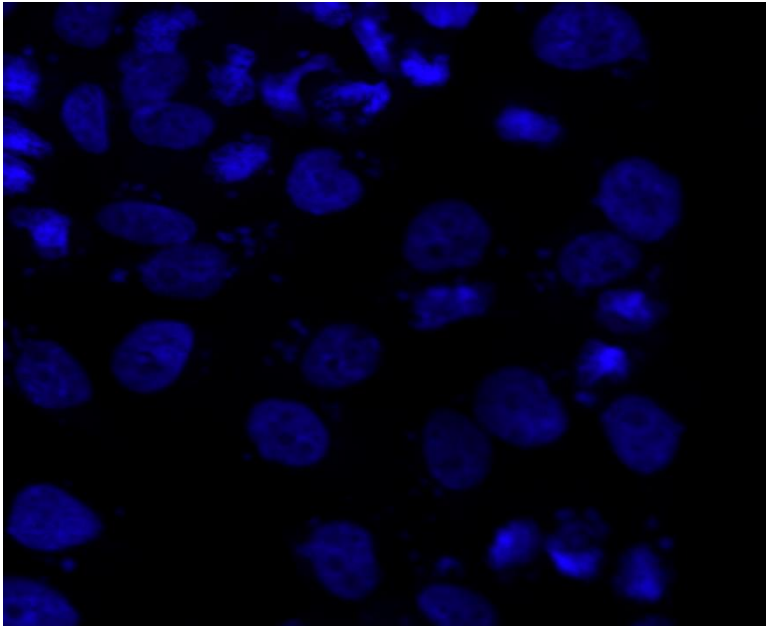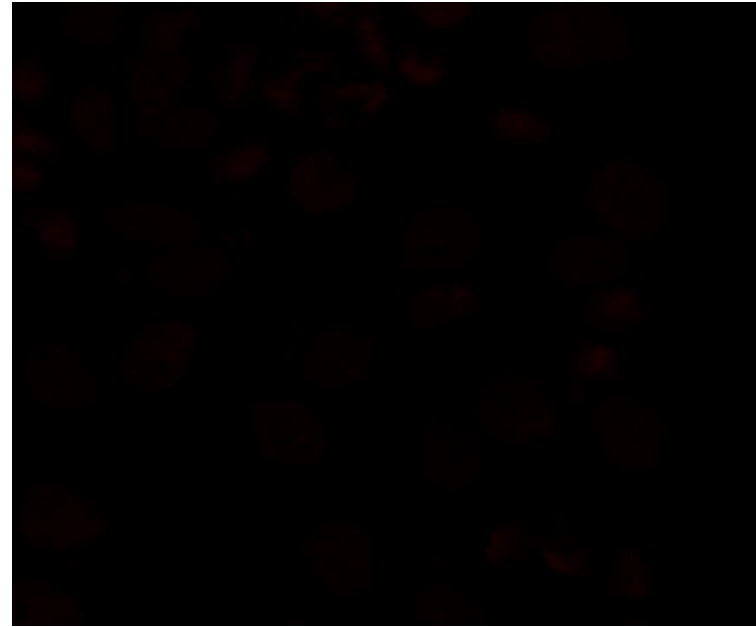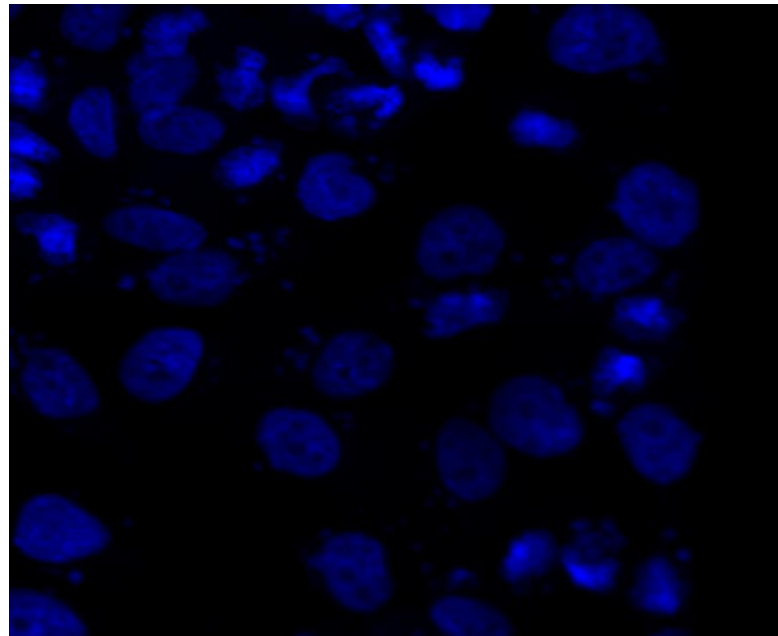

20X (x) 3X digital zoom

Figure S22. Current Figure 5B and former Figure 6A – VDAC

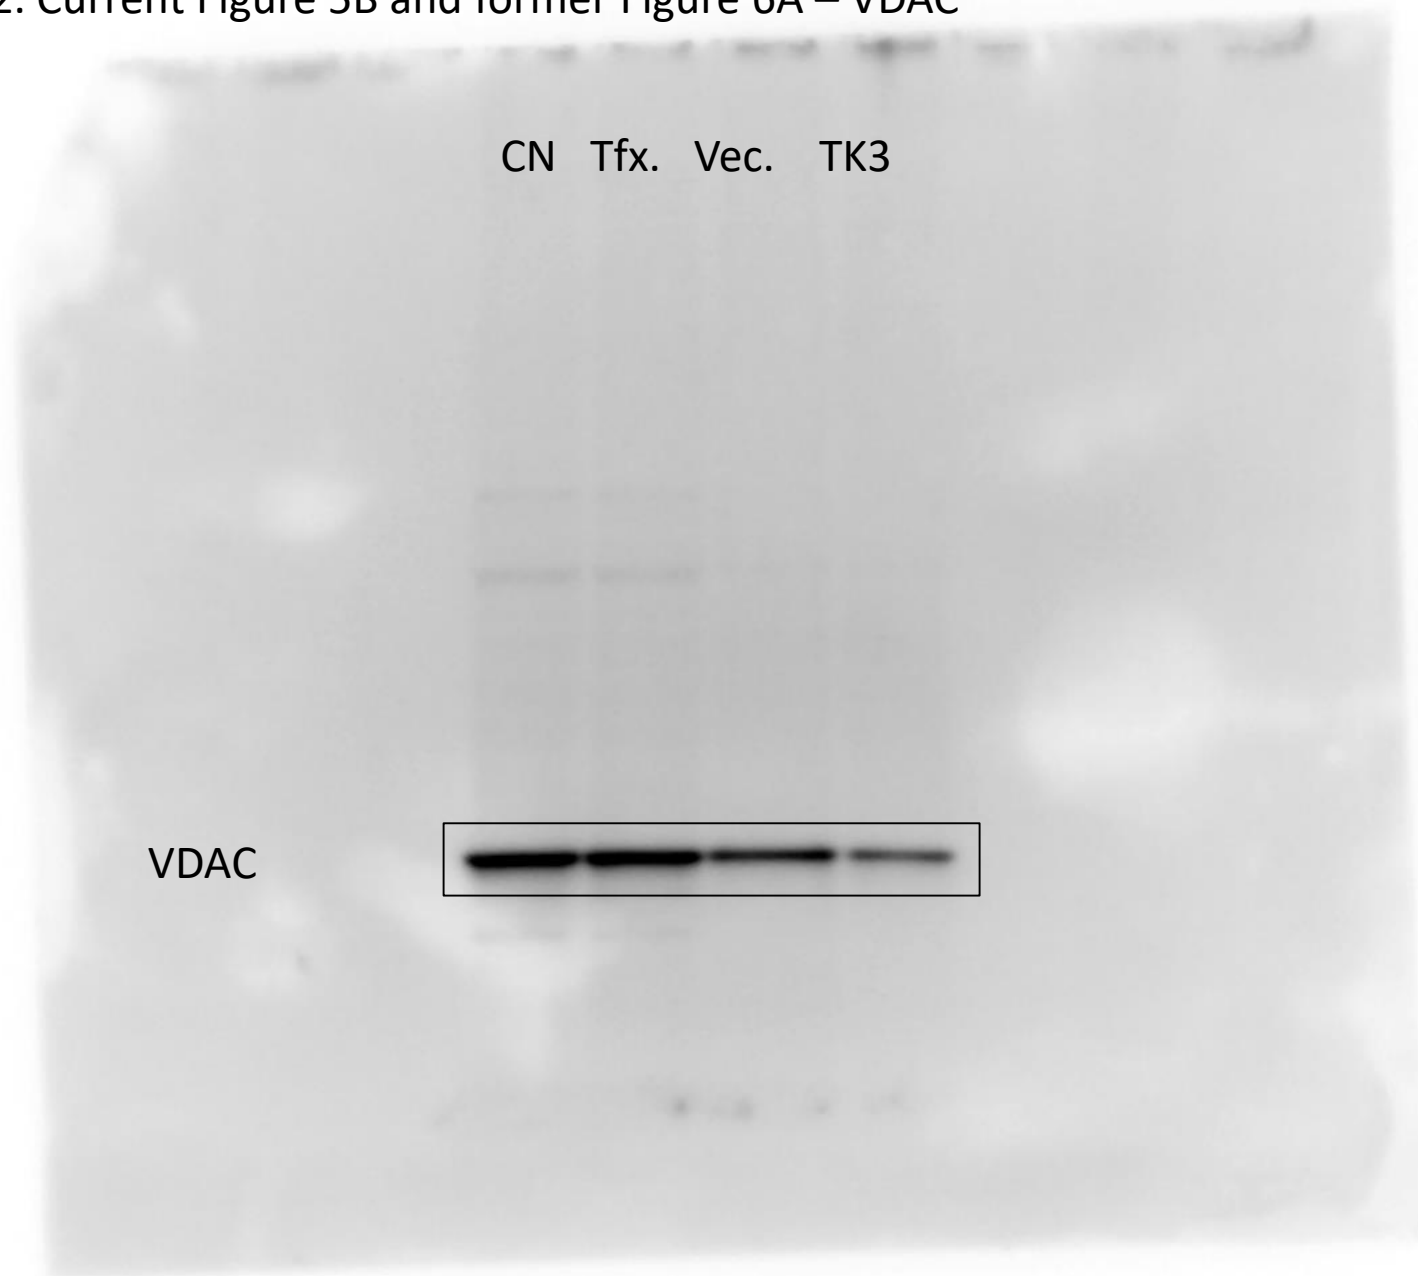

Figure S23. Current Figure 6A and Prior Figure 5D – HEK293 – TASK3 – 42KDa

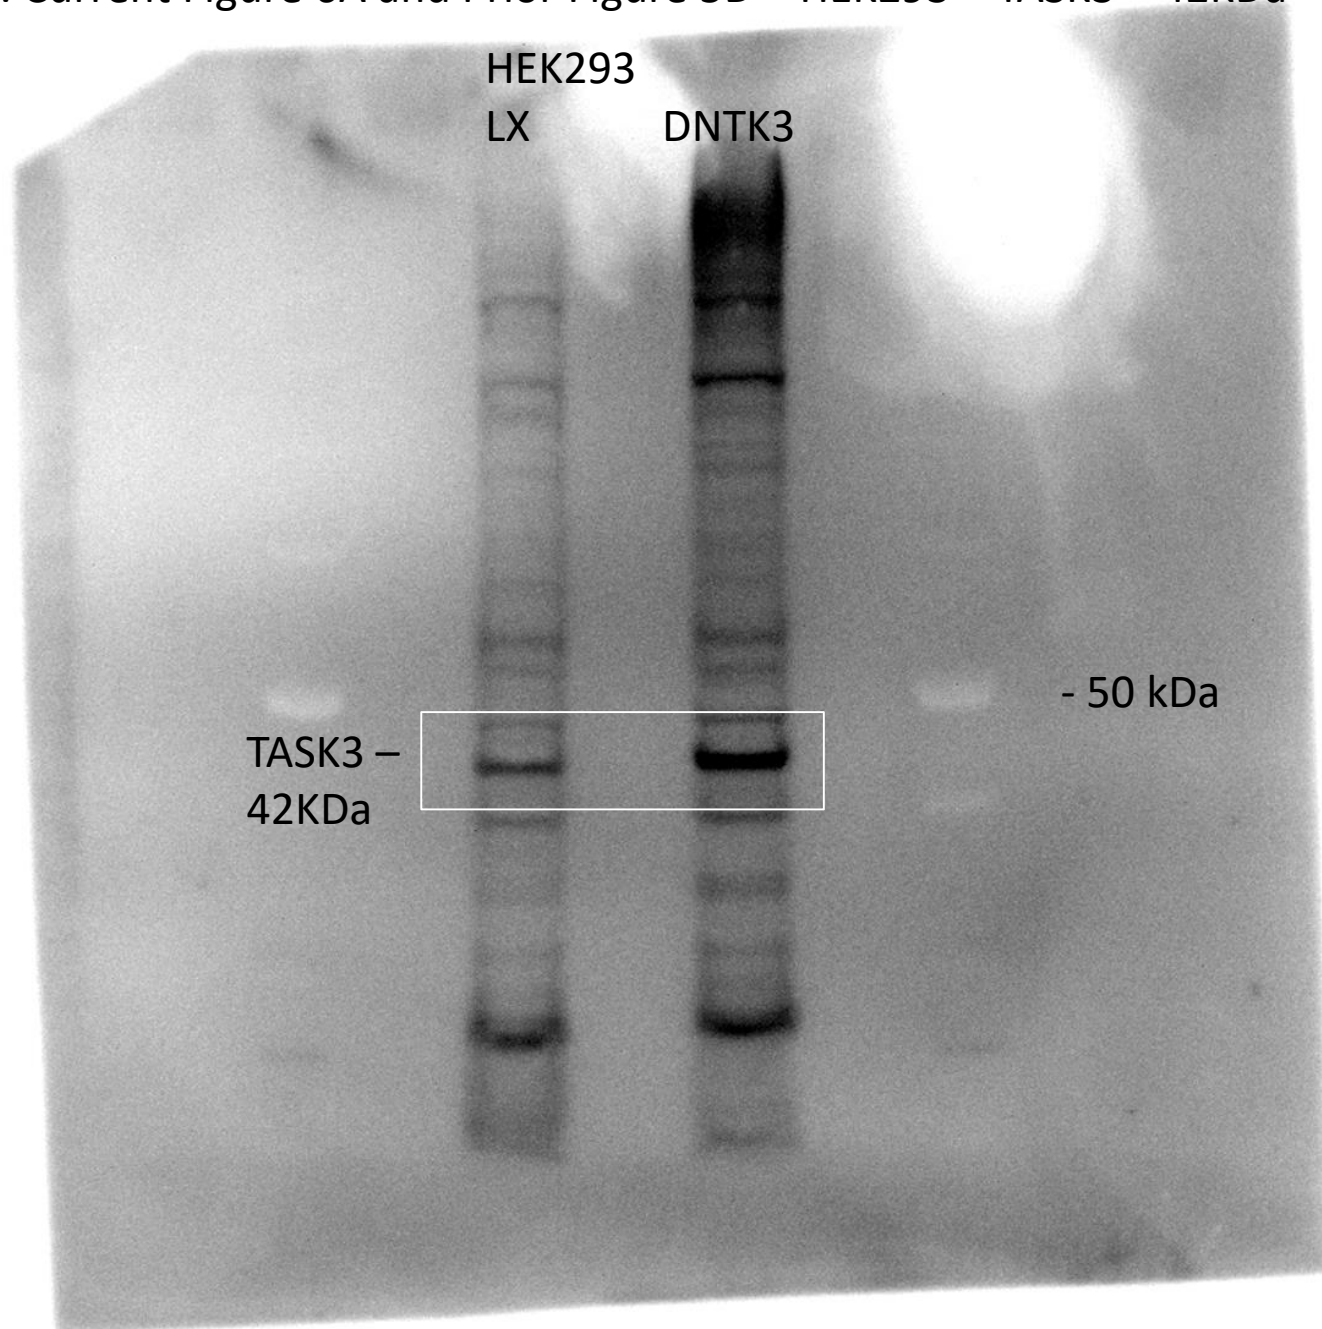

Figure S24. Current Figure 6A and Prior Figure 5D – HEK293 –GAPDH

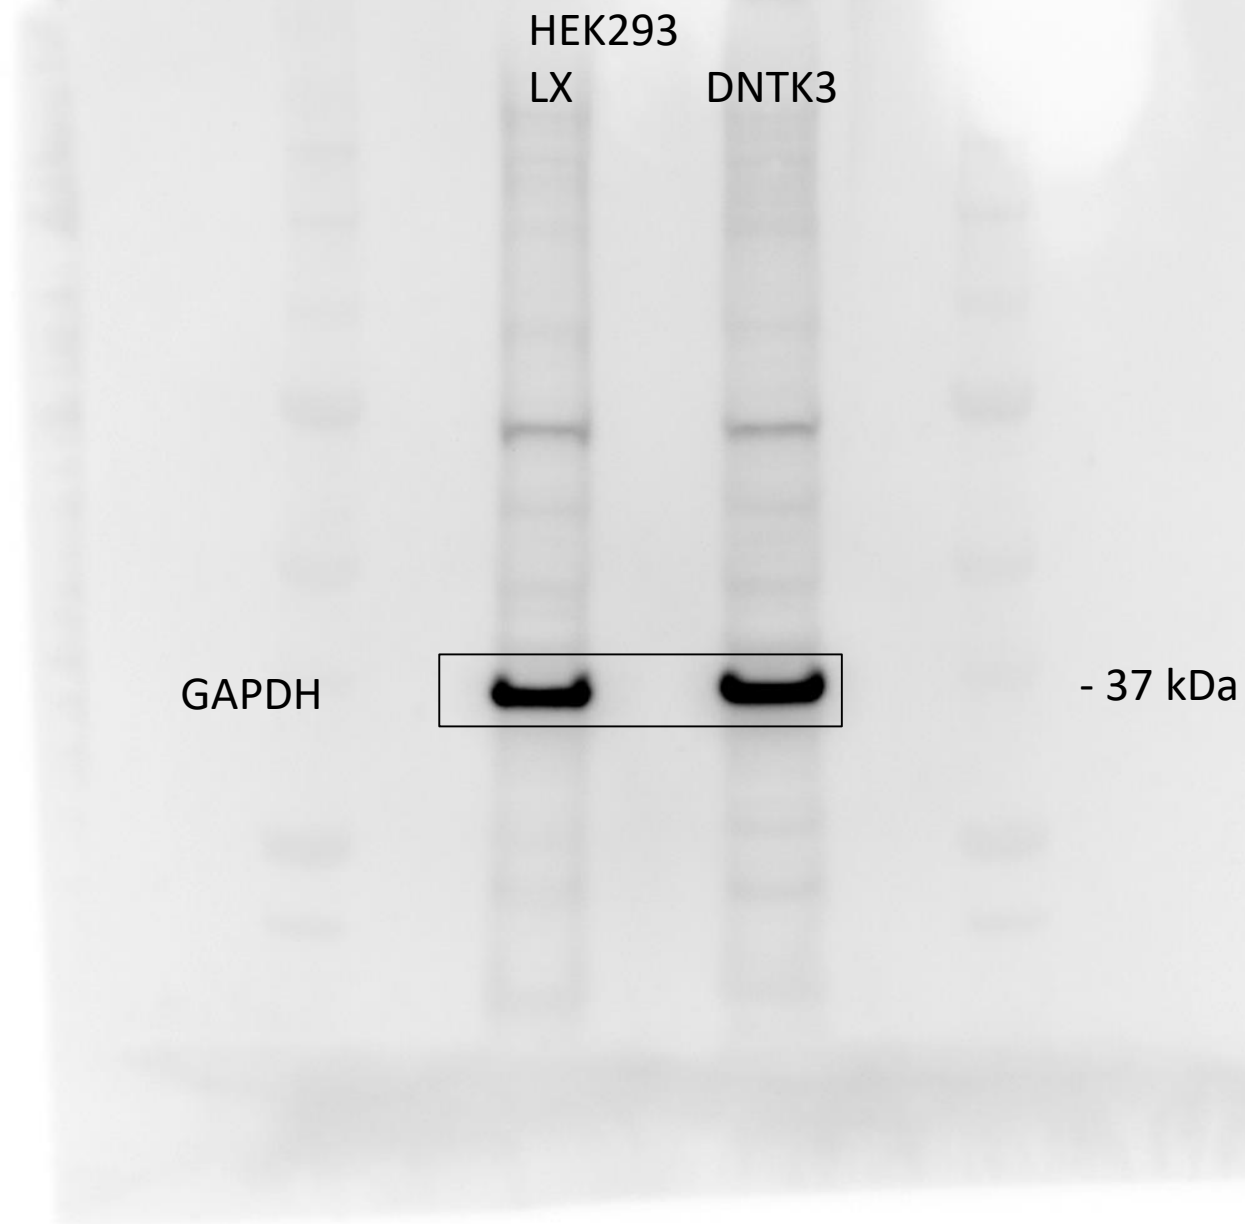



Figure S25. Current Figure 6A and Prior Figure 5D – MDA231 – TASK3 – 42KDa

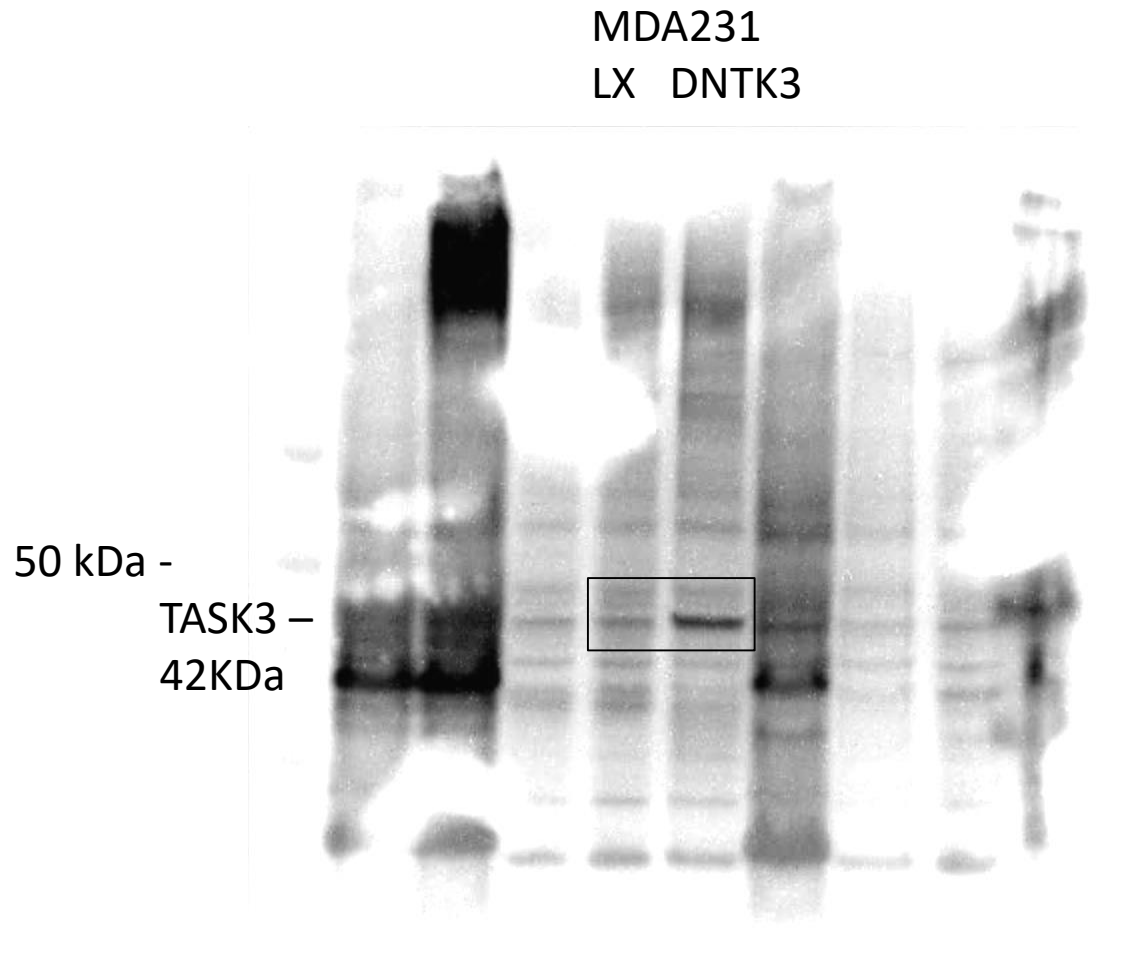

Figure S26. Current Figure 6A and Prior Figure 5D – MDA231 – GAPDH

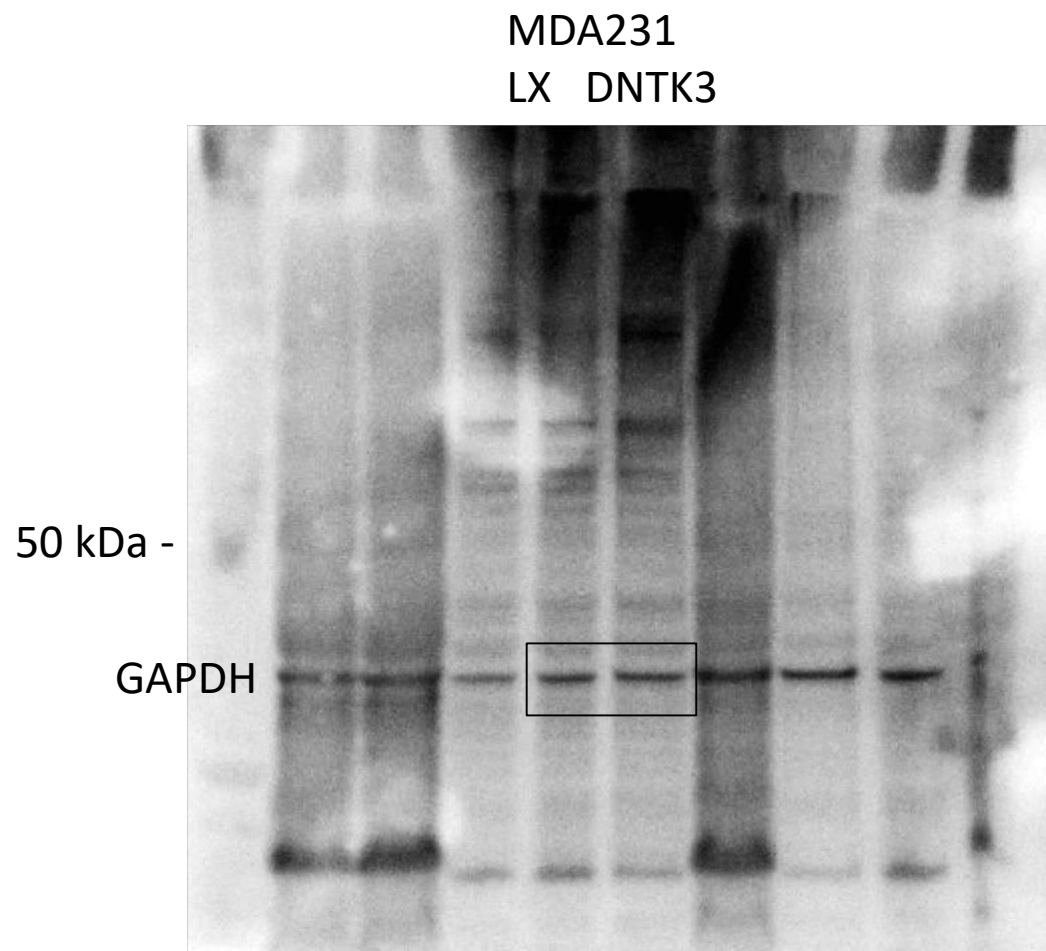

Figure S27. Current Figure 6A and Prior Figure 5D – DKAT – TASK3

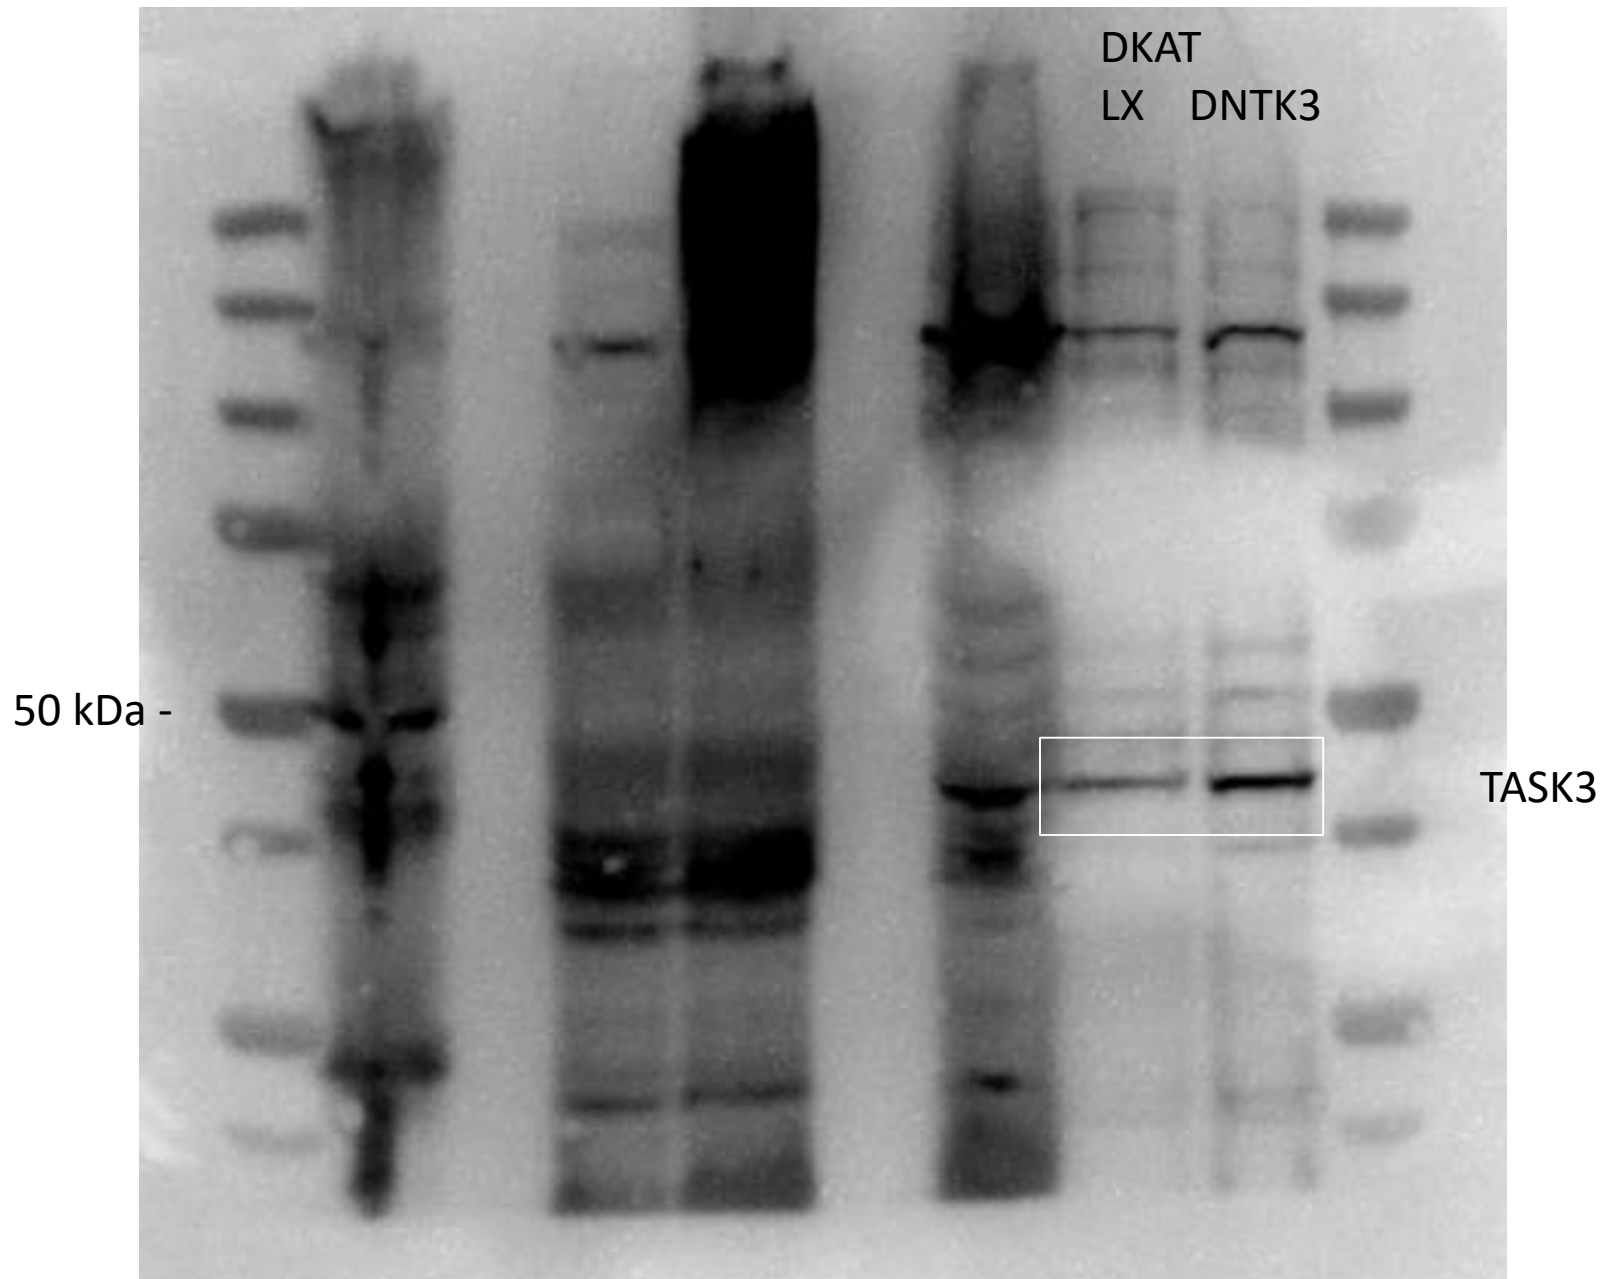

Figure S28. Current Figure 6A and Prior Figure 5D – DKAT – GAPDH

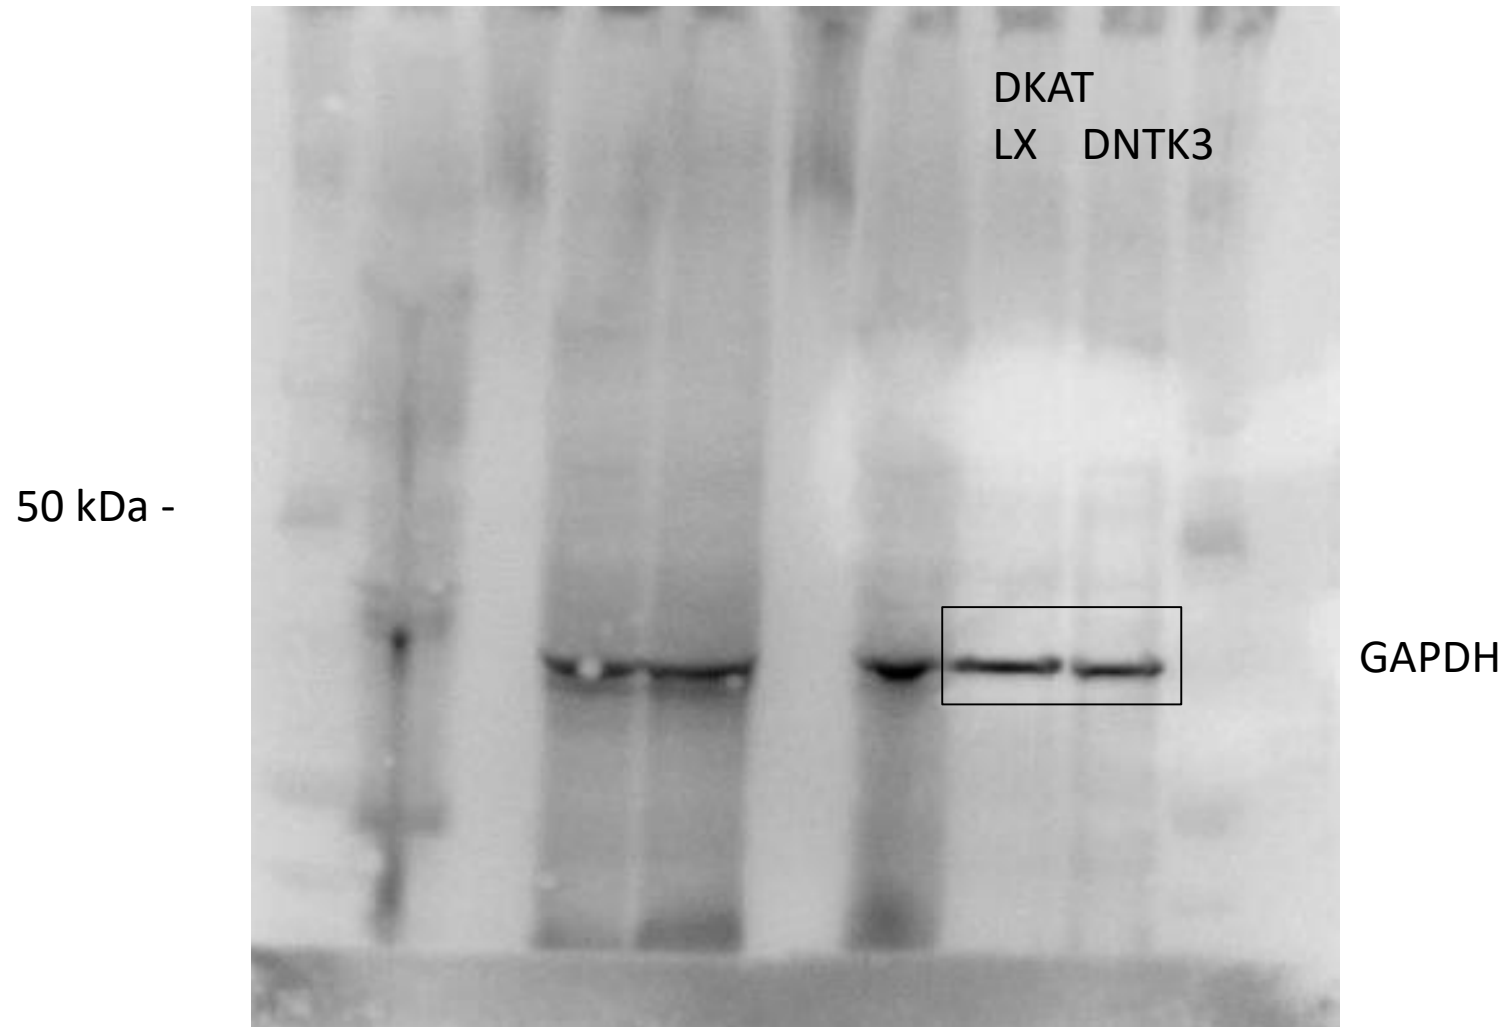

Figure S29. Current Figure 6A and Prior Figure 5D – SUM225 – TASK3 – 42KDa

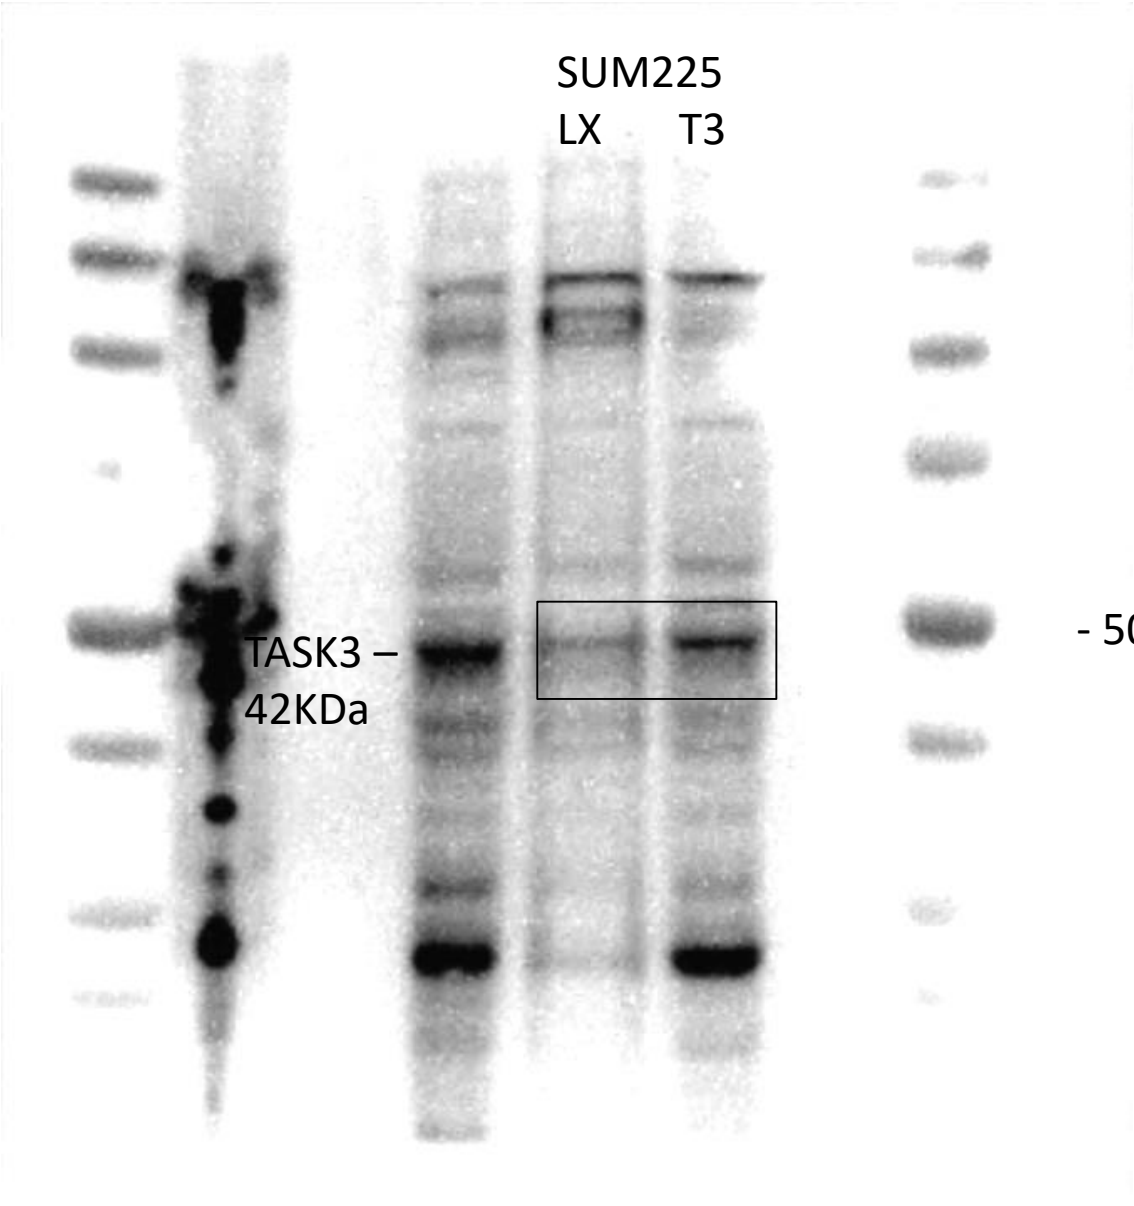

Figure S30. Current Figure 6A and Prior Figure 5D – SUM225 – GAPDH

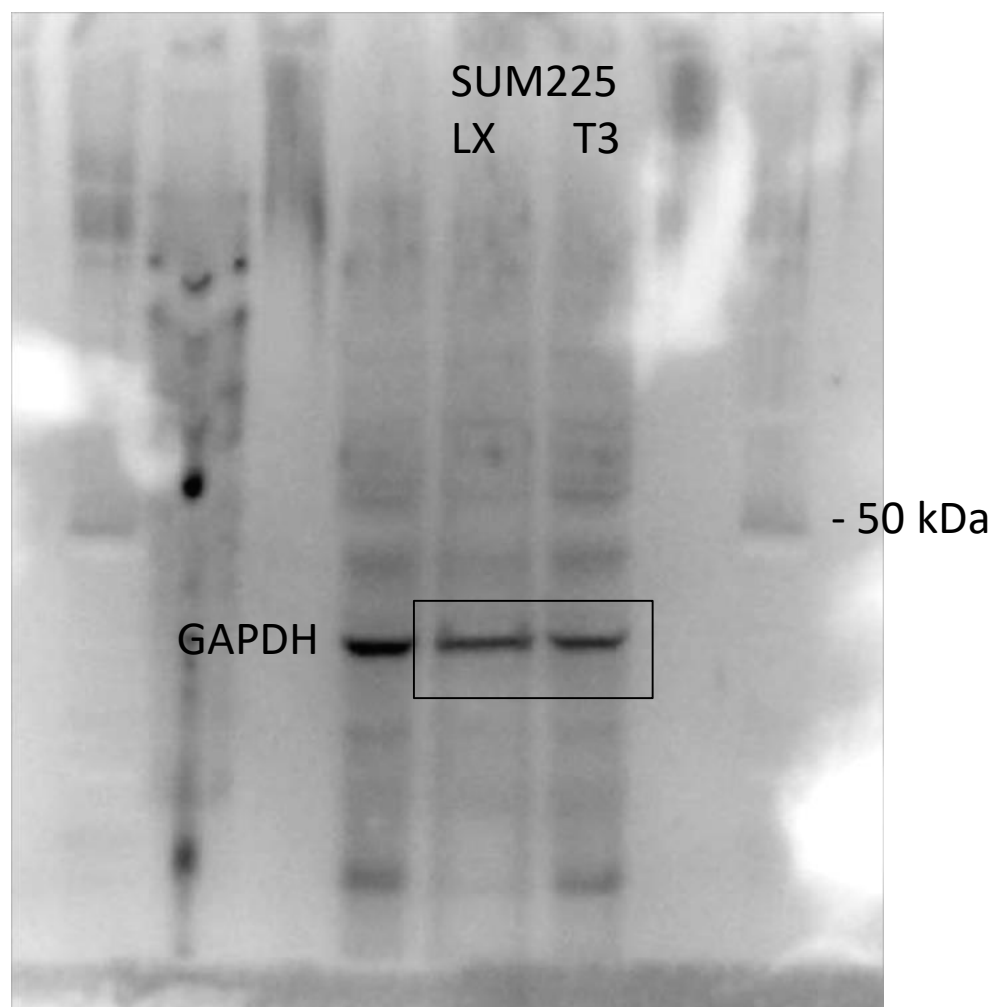

Supplement: s1 [file s1]
